# Supplementary material for: Planar carbon radical’s assembly and stabilization, a way to design spin-based molecular materials
Source: Royal Society of Chemistry journal article supplement (doi:10.1039/b707898f), 2007-01-01

# Planar carbon radical's assembly and stabilization, a way to design spin-based molecular materials

Li-ming Yang, Yi-hong Ding,\* Wei Quan Tian, Chia-chung Sun

*State Key Laboratory of Theoretical and Computational Chemistry, Institute of Theoretical Chemistry, Jilin University, Changchun 130023, People's Republic of China*

(E-mail: [yhdd@mail.jlu.edu.cn](mailto:yhdd@mail.jlu.edu.cn); Fax: +86-431-8498026)

## *Supporting information*

### **Full citations for ref 13f:**

13.(f) Gaussian03 (RevisionA.1), M. J. Frisch, G. W. Trucks, H. B. Schlegel, G. E. Scuseria, M. A. Robb, J. R. Cheeseman, J. A. Montgomery, Jr., T. Vreven, K. N. Kudin, J. C. Burant, J. M. Millam, S. S. Iyengar, J. Tomasi, V. Barone, B. Mennucci, M. Cossi, G. Scalmani, N. Rega, G. A. Petersson, H. Nakatsuji, M. Hada, M. Ehara, K. Toyota, R. Fukuda, J. Hasegawa, M. Ishida, T. Nakajima, Y. Honda, O. Kitao, H. Nakai, M. Klene, X. Li, J. E. Knox, H. P. Hratchian, J. B. Cross, C. Adamo, J. Jaramillo, R. Gomperts, R. E. Stratmann, O. Yazyev, A. J. Austin, R. Cammi, C. Pomelli, J. W. Ochterski, P. Y. Ayala, K. Morokuma, G. A. Voth, P. Salvador, J. J. Dannenberg, V. G. Zakrzewski, S. Dapprich, A. D. Daniels, M. C. Strain, O. Farkas, D. K. Malick, A. D. Rabuck, K. Raghavachari, J. B. Foresman, J. V. Ortiz, Q. Cui, A. G. Baboul, S. Clifford, J. Cioslowski, B. B. Stefanov, G. Liu, A. Liashenko, P. Piskorz, I. Komaromi, R. L. Martin, D. J. Fox, T. Keith, M. A. Al-Laham, C. Y. Peng, A. Nanayakkara, M. Challacombe, P. M.W. Gill, B. Johnson, W. Chen, M.W. Wong, C. Gonzalez, J. A. Pople, Gaussian, Inc., Pittsburgh, PA, **2003**.

**Some calculated structural, electronic and magnetic properties of our designed hetero-decked sandwich-type complexes are listed in Table S1-4.**

**Table S1.** The calculated spin densities of the  $\text{CAL}_4^-$  units in all of the homo-decked sandwich forms of  $[(\text{CAL}_4)_2\text{M}]^{q-}$  (s-s) (M=Li, Na, K, q=1; M=Be, Mg, Ca, q=0) at 6-31+G(d)-UB3LYP/UMP2 level. The spin densities of the  $\text{CAL}_4^-$  units in the hetero-decked sandwich forms P, V, P-P, P-V and V-V, are obtained at the UB3LYP/6-31+G(d) level. The equivalent of the two  $\text{CAL}_4$ -decks due to the symmetry of  $\text{D}_{2d}$  sandwich forms, we label the two  $\text{CAL}_4$ -decks as deck1 and deck2, respectively. For the hetero-decked sandwich forms P, V, P-P, P-V and V-V, the deck1, deck2 and deck3 are illustrative in Fig. 7.

| Sandwich Species (s-s) $\text{D}_{2d}$ | Spin density of several fragments | UB3LYP/6-31+G(d) |                | UMP2/6-31+G(d) |         |
|----------------------------------------|-----------------------------------|------------------|----------------|----------------|---------|
|                                        |                                   | singlet          | triplet        | singlet        | triplet |
| $[(\text{CAL}_4)_2\text{Li}]^-$        | deck1                             | 0.9921           | 0.9917         | 0.8929         | 0.9066  |
|                                        | deck2                             | -0.9921          | 0.9917         | -0.8929        | 0.9066  |
| $[(\text{CAL}_4)_2\text{Na}]^-$        | deck1                             | 0.9918           | 1.0029         | 0.9643         | 1.0223  |
|                                        | deck2                             | -0.9918          | 1.0029         | -0.9643        | 1.0223  |
| $[(\text{CAL}_4)_2\text{K}]^-$         | deck1                             | 0.9993           | 0.9998         | 0.9864         | 0.9874  |
|                                        | deck2                             | -0.9993          | 0.9998         | -0.9864        | 0.9874  |
| $[(\text{CAL}_4)_2\text{Be}]$          | deck1                             | 1.0275           | 1.0189         | 1.2101         | 1.1060  |
|                                        | deck2                             | -1.0275          | 1.0189         | -1.2101        | 1.1060  |
| $[(\text{CAL}_4)_2\text{Mg}]$          | deck1                             | 1.0231           | 1.0226         | 1.0258         | 1.0427  |
|                                        | deck2                             | -1.0231          | 1.0226         | -1.0258        | 1.0427  |
| $[(\text{CAL}_4)_2\text{Ca}]$          | deck1                             | 0.9904           | 0.9945         | 1.0528         | 1.1231  |
|                                        | deck2                             | -0.9904          | 0.9945         | -1.0528        | 1.1231  |
|                                        |                                   | <b>singlet</b>   | <b>triplet</b> |                |         |
| P                                      | deck1                             | -1.0072          | 1.0067         |                |         |
|                                        | deck2                             | 1.0071           | 1.0066         |                |         |
| V                                      | deck1                             | 1.0025           | 1.0025         |                |         |
|                                        | deck2                             | -1.0024          | 1.0024         |                |         |
|                                        |                                   | <b>doublet</b>   | <b>quartet</b> |                |         |
| P-V                                    | deck1                             | 1.0110           | 1.0106         |                |         |
|                                        | deck2                             | -0.9671          | 0.9665         |                |         |
|                                        | deck3                             | 1.0062           | 1.0061         |                |         |
| P-P                                    | deck1                             | 1.0107           | 1.0103         |                |         |
|                                        | deck2                             | -0.9632          | 0.9622         |                |         |
|                                        | deck3                             | 1.0081           | 1.0081         |                |         |
| V-V                                    | deck1                             | 1.0053           | 1.0056         |                |         |
|                                        | deck2                             | -0.9574          | 0.9574         |                |         |
|                                        | deck3                             | 1.0056           | 1.0057         |                |         |

**Table S2.** The calculated spin densities of the  $\text{CAL}_4^-$  units in all of the hetero-decked sandwich forms (f-f, f-s and f-c) of  $[\text{CpM}(\text{CAL}_4)]^{q-}$  and in the ground states of saturated sandwich-type compounds  $(\text{Li}^+)_q[\text{CpLi}(\text{CAL}_4)]^{q-}$

(M=Li, Na, K, q=1; M=Be, Mg, Ca, q=0) and in the low-lying structures of extended sandwich-like compounds  $[(\text{CpLi})_n(\text{CAL}_4)]^-$  (n=2, 3, 4 and 6) at UB3LYP/6-31+G(d) level.

| Spin densities of the $\text{CAL}_4^-$ units in all kinds of designed sandwich-type species |                 |                 |                   |                                              |        |
|---------------------------------------------------------------------------------------------|-----------------|-----------------|-------------------|----------------------------------------------|--------|
| Ref specie: $\text{CAL}_4^-$                                                                | 1.0000          |                 |                   | Saturated sandwiches                         |        |
| Sandwich species                                                                            | Face-face (f-f) | Face-side (f-s) | Face-corner (f-c) | $(\text{Li}^+)[\text{CpLi}(\text{CAL}_4)]^-$ | 0.9591 |
| $[\text{CpLi}(\text{CAL}_4)]^-$                                                             | 1.2827          | 0.9899          | 0.7892            | $(\text{Li}^+)[\text{CpNa}(\text{CAL}_4)]^-$ | 0.9625 |
| $[\text{CpNa}(\text{CAL}_4)]^-$                                                             | 1.1462          | 0.9974          | 1.0067            | $(\text{Li}^+)[\text{CpK}(\text{CAL}_4)]^-$  | 0.9652 |
| $[\text{CpK}(\text{CAL}_4)]^-$                                                              | 1.0227          | 0.9986          | 1.0000            | $[(\text{CpLi})_2(\text{CAL}_4)]^-$          | 1.1483 |
| $[\text{CpBe}(\text{CAL}_4)]^-$                                                             | 1.0048          | 0.9730          |                   | $[(\text{CpLi})_3(\text{CAL}_4)]^-$          | 1.0587 |
| $[\text{CpMg}(\text{CAL}_4)]^-$                                                             | 1.2043          | 1.0304          |                   | $[(\text{CpLi})_4(\text{CAL}_4)]^-$          | 1.0716 |
| $[\text{CpCa}(\text{CAL}_4)]^-$                                                             | 1.0386          | 0.9983          |                   | $[(\text{CpLi})_6(\text{CAL}_4)]^-$          | 1.0802 |

**Table S3.** The natural charge distribution of the  $\text{CAL}_4^-$  units in all of the sandwich-like species with more than one ptC-radical  $\text{CAL}_4^-$ -decks (including homo-decked sandwich forms (s-s) of  $[(\text{CAL}_4)_2\text{M}]^{q-}$  and hetero-decked extended sandwich forms of P, V, P-V, P-P and V-V) at UB3LYP/6-31+G(d) level.

| Sandwich Species (s-s) $D_{2d}$ | Charge distribution of several fragments | UB3LYP/6-31+G(d) |                | UMP2/6-31+G(d) |         |
|---------------------------------|------------------------------------------|------------------|----------------|----------------|---------|
|                                 |                                          | singlet          | triplet        | singlet        | triplet |
| $[(\text{CAL}_4)_2\text{Li}]^-$ | deck1                                    | -0.8284          | -0.8373        | -0.8328        | -0.8336 |
|                                 | deck2                                    | -0.8284          | -0.8373        | -0.8328        | -0.8336 |
| $[(\text{CAL}_4)_2\text{Na}]^-$ | deck1                                    | -0.8500          | -0.8655        | -0.8807        | -0.8812 |
|                                 | deck2                                    | -0.8500          | -0.8655        | -0.8807        | -0.8812 |
| $[(\text{CAL}_4)_2\text{K}]^-$  | deck1                                    | -0.9311          | -0.9312        | -0.9382        | -0.9384 |
|                                 | deck2                                    | -0.9311          | -0.9312        | -0.9382        | -0.9384 |
| $[(\text{CAL}_4)_2\text{Be}]$   | deck1                                    | -0.3910          | -0.3992        | -0.3808        | -0.3882 |
|                                 | deck2                                    | -0.3910          | -0.3992        | -0.3808        | -0.3882 |
| $[(\text{CAL}_4)_2\text{Mg}]$   | deck1                                    | -0.5551          | -0.5655        | -0.5932        | -0.6091 |
|                                 | deck2                                    | -0.5551          | -0.5655        | -0.5932        | -0.6091 |
| $[(\text{CAL}_4)_2\text{Ca}]$   | deck1                                    | -0.7485          | -0.7482        | -0.7447        | -0.7445 |
|                                 | deck2                                    | -0.7485          | -0.7482        | -0.7447        | -0.7445 |
|                                 |                                          | <b>singlet</b>   | <b>triplet</b> |                |         |
| P                               | deck1                                    | -0.8469          | -0.8469        |                |         |
|                                 | deck2                                    | -0.8468          | -0.8467        |                |         |
| V                               | deck1                                    | -0.9239          | -0.9240        |                |         |
|                                 | deck2                                    | -0.9241          | -0.9241        |                |         |
|                                 |                                          | <b>doublet</b>   | <b>quartet</b> |                |         |
| P-V                             | deck1                                    | -0.8021          | -0.8021        |                |         |
|                                 | deck2                                    | -0.9096          | -0.9095        |                |         |
|                                 | deck3                                    | -0.8368          | -0.8369        |                |         |
| P-P                             | deck1                                    | -0.7984          | -0.7995        |                |         |
|                                 | deck2                                    | -0.9074          | -0.9124        |                |         |
|                                 | deck3                                    | -0.8231          | -0.8232        |                |         |

|     |       |         |         |  |  |
|-----|-------|---------|---------|--|--|
| V-V | deck1 | -0.8796 | -0.8796 |  |  |
|     | deck2 | -1.0617 | -1.0621 |  |  |
|     | deck3 | -0.8803 | -0.8804 |  |  |

**Table S4.** The natural charge distribution of the hetero-decked unsaturated, saturated and extended sandwich-like species with one ptC-radical  $CAI_4^-$ -deck are obtained at the UB3LYP/6-31+G(d) level.

|                       | Natural charge distribution of the $CAI_4^-$ units in all kinds of designed sandwich-type species |                 |                   |                         |         |
|-----------------------|---------------------------------------------------------------------------------------------------|-----------------|-------------------|-------------------------|---------|
| Ref specie: $CAI_4^-$ | -1.0000                                                                                           |                 |                   | Saturated sandwiches    |         |
| Sandwich species      | Face-face (f-f)                                                                                   | Face-side (f-s) | Face-corner (f-c) | $(Li^+)[CpLi(CAI_4)]^-$ | -0.7315 |
| $[CpLi(CAI_4)]^-$     | -1.0006                                                                                           | -0.9087         | -0.9362           | $(Li^+)[CpNa(CAI_4)]^-$ | -0.7468 |
| $[CpNa(CAI_4)]^-$     | -1.2355                                                                                           | -1.1969         | -0.8354           | $(Li^+)[CpK(CAI_4)]^-$  | -0.8284 |
| $[CpK(CAI_4)]^-$      | -0.9907                                                                                           | -0.9784         | -0.9755           | $[(CpLi)_2(CAI_4)]^-$   | -0.9483 |
| $[CpBe(CAI_4)]$       | -0.8759                                                                                           | -0.4221         |                   | $[(CpLi)_3(CAI_4)]^-$   | -0.9688 |
| $[CpMg(CAI_4)]$       | -0.8800                                                                                           | -0.5886         |                   | $[(CpLi)_4(CAI_4)]^-$   | -0.9783 |
| $[CpCa(CAI_4)]$       | -0.9039                                                                                           | -0.7898         |                   | $[(CpLi)_6(CAI_4)]^-$   | -0.9817 |

1. An imaginary frequency indicates the existence of a vibrational mode that is dynamically unstable and leads to a more stable structure. Transition states of a chemical reaction are saddle points exhibiting only one imaginary frequency. Saddle points with more dynamical systems with sufficiently high vibrational energy but are generally not of chemical significance. The criteria of SCF converge is  $10^{-6}$  used in the present systems.

In this report, **NIMAG** means the number of imaginary frequency of saddle point.<sup>[S50]</sup>

${}^m\text{N}^q$ : “**m**” means spin electron state (singlet, triplet), “**N**” means the energy order of various isomers, superscript “**q-**” means the charge of the total system.

### 1. The calculated properties of $\text{C}_2\text{Al}_8\text{Li}^-$

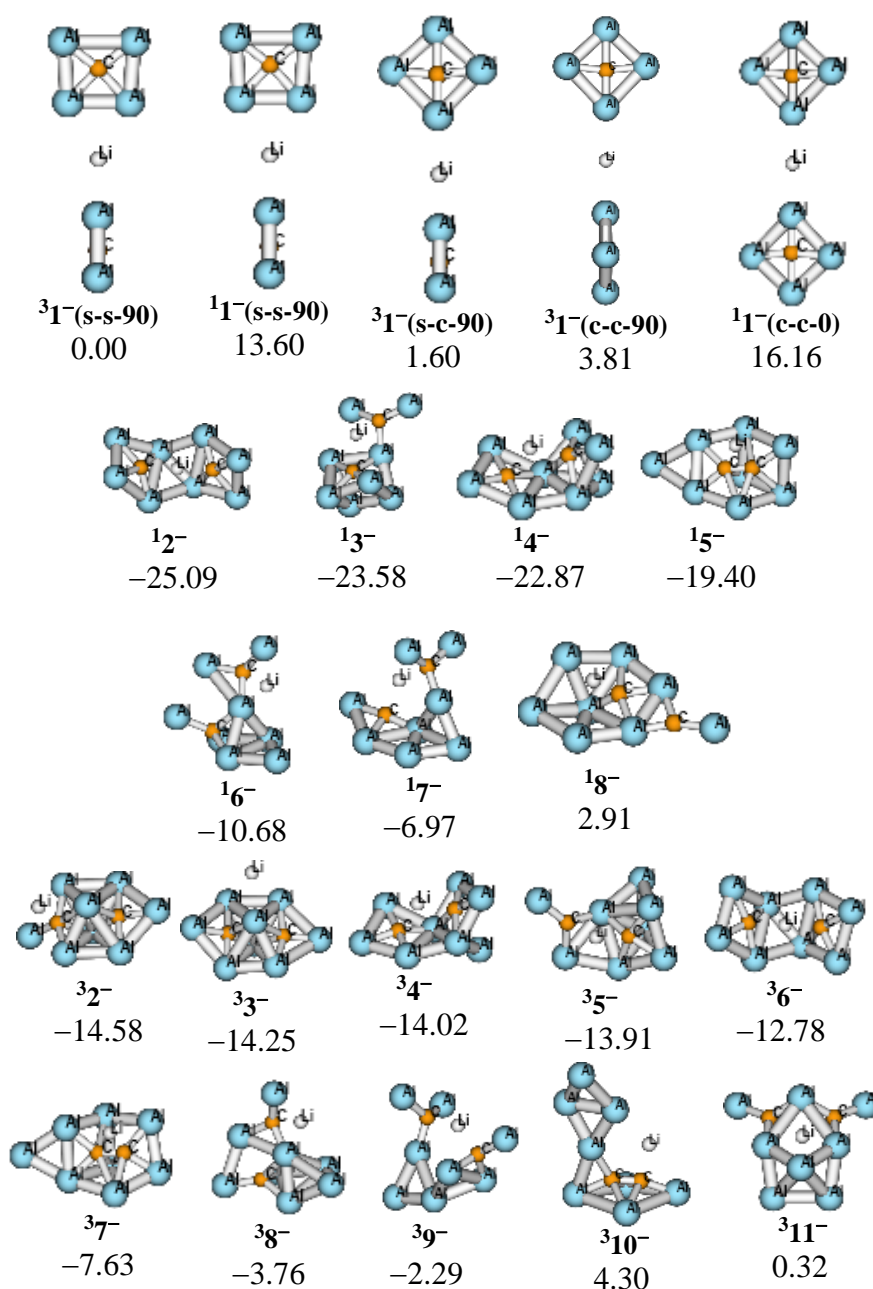

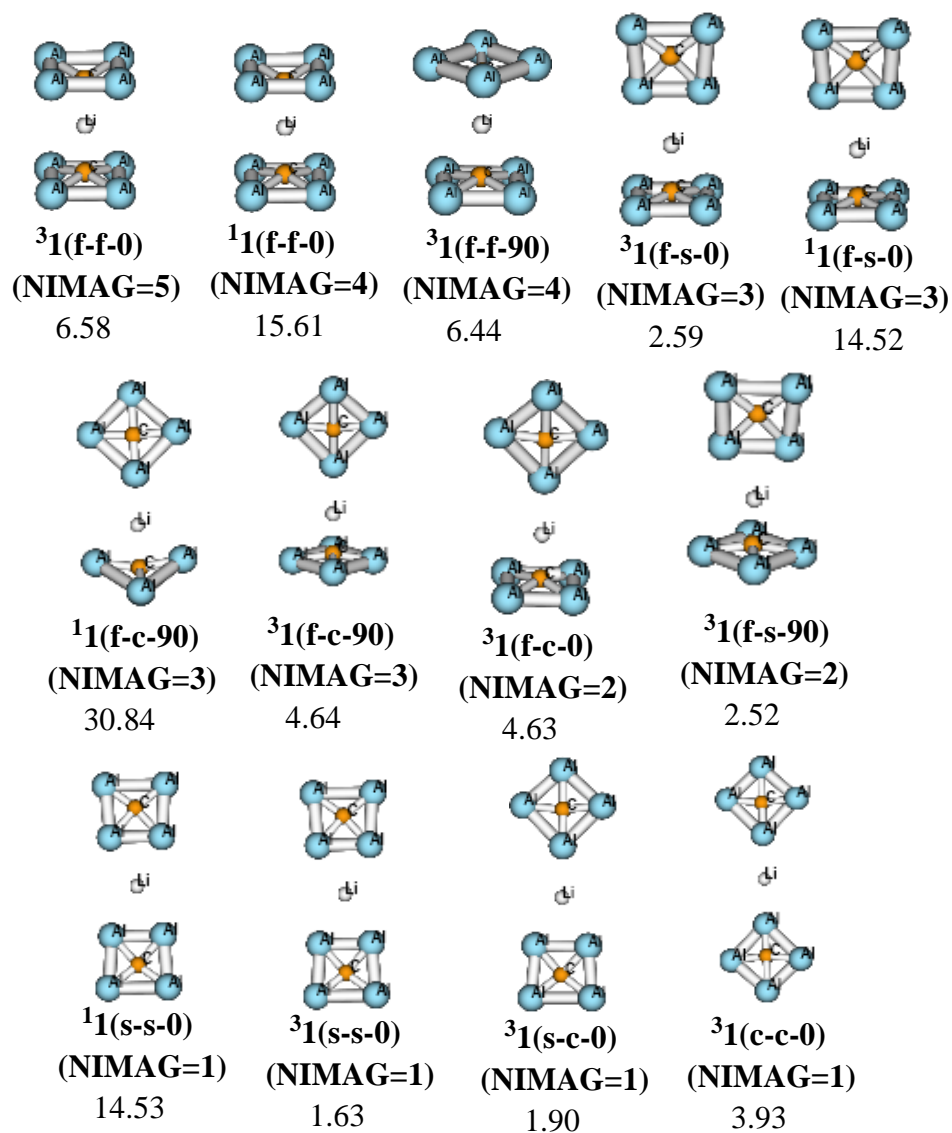

## 2. The calculated properties of $C_2Al_8Na^-$

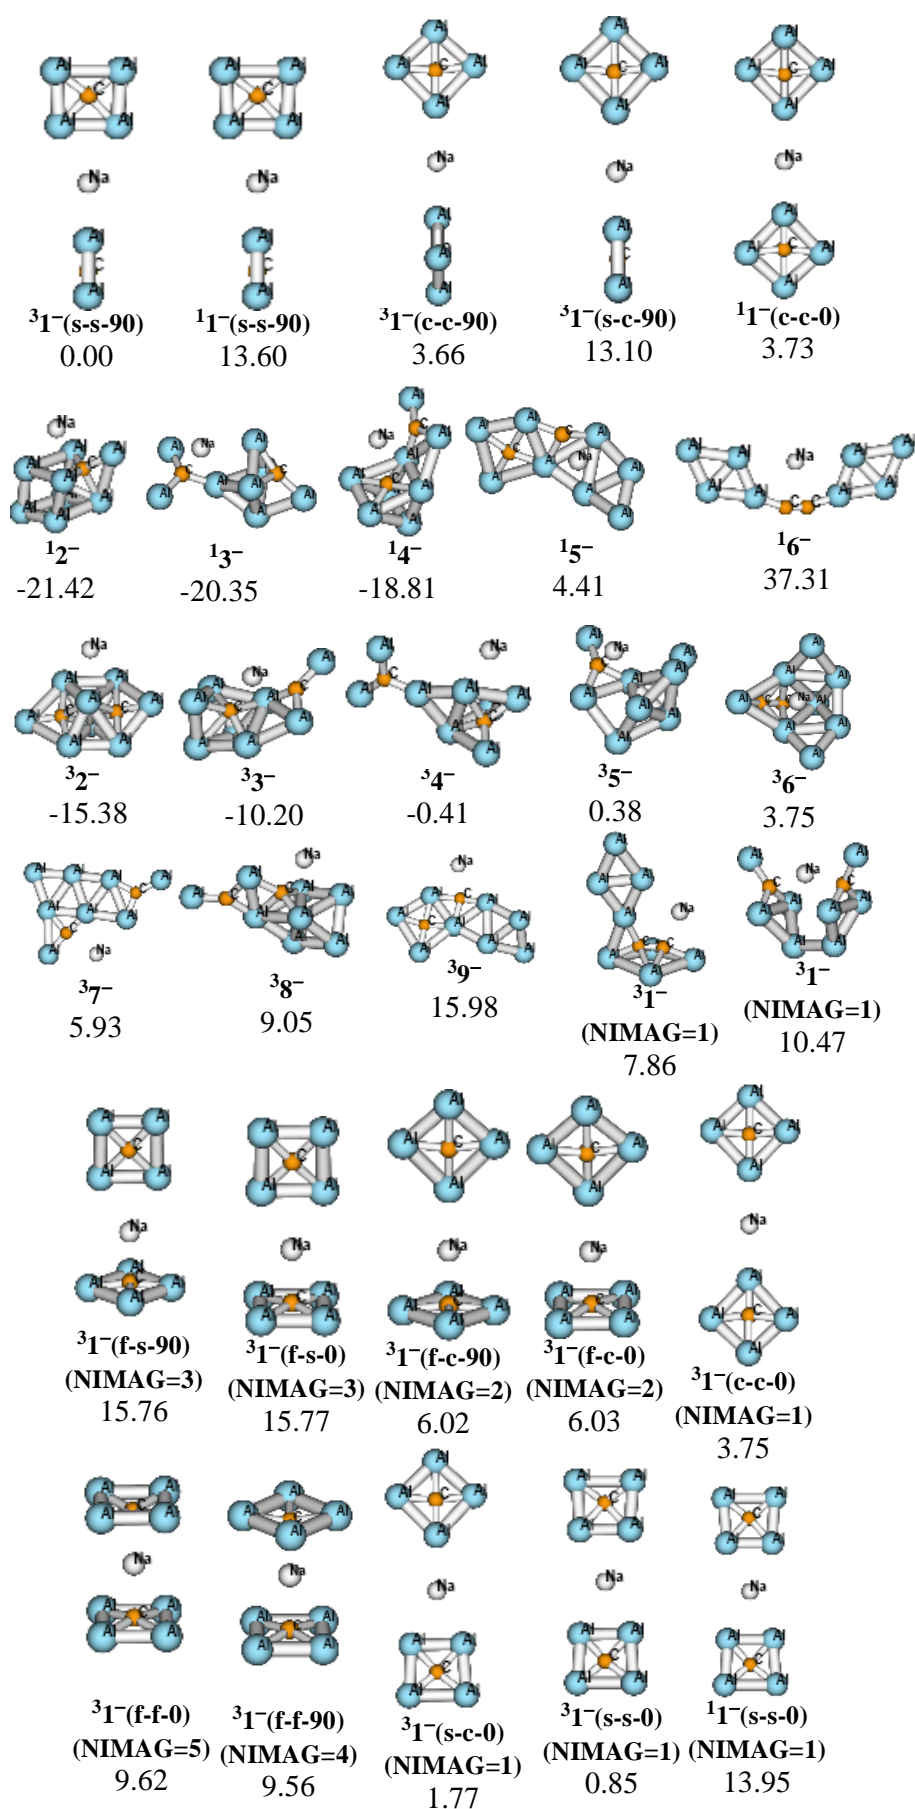

### **3. The calculated properties of $C_2Al_8K^-$**



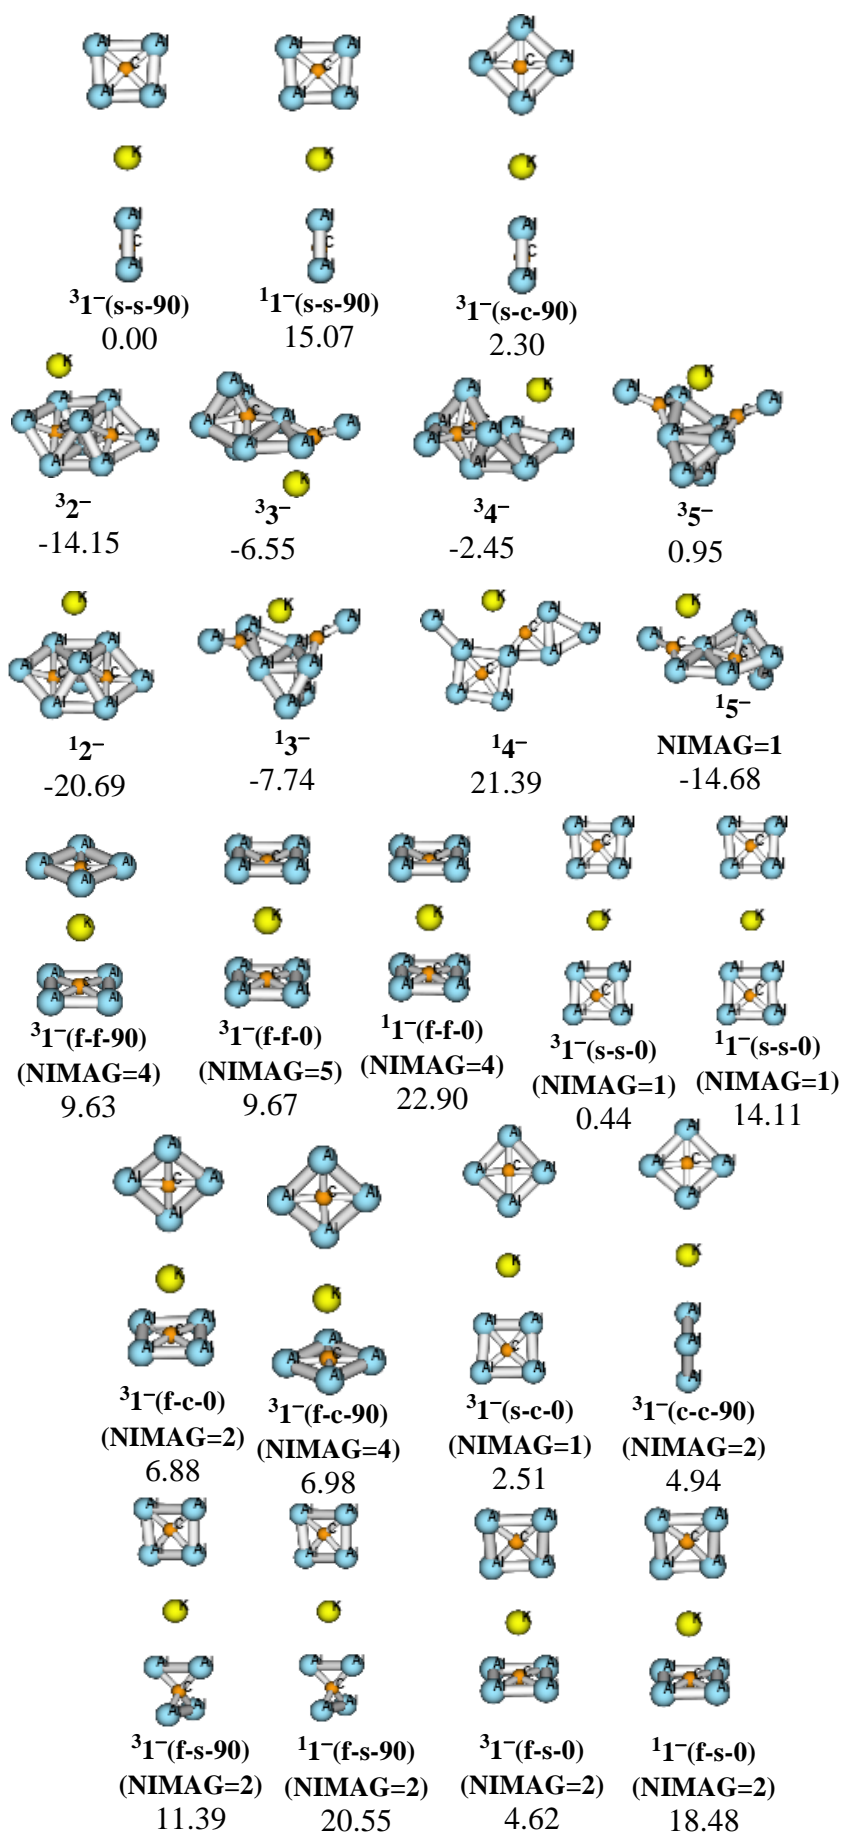

#### 4. The calculated properties of $C_2Al_8Be$

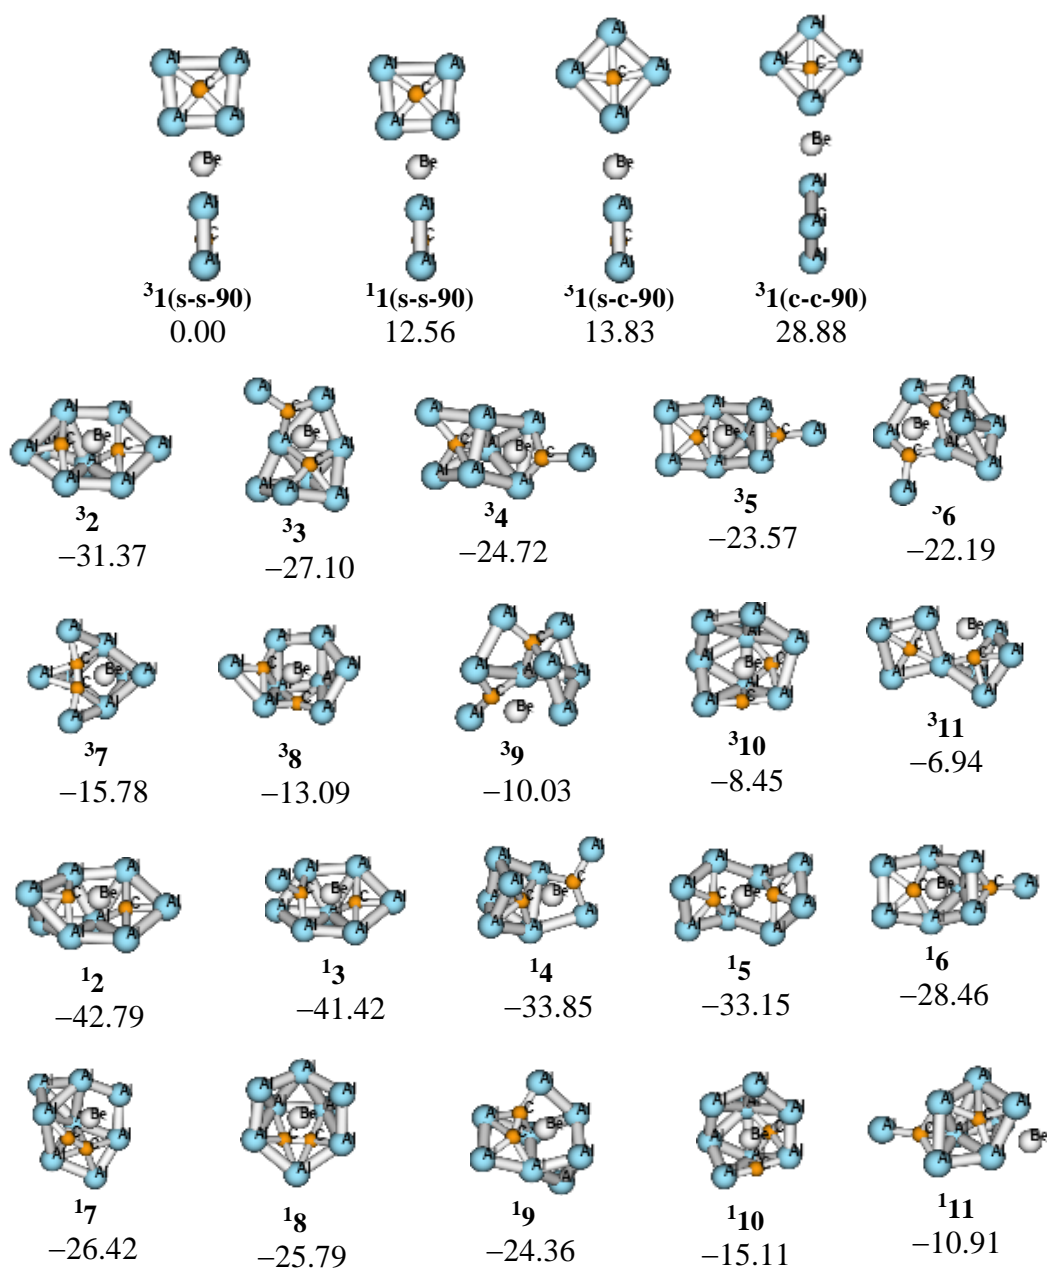

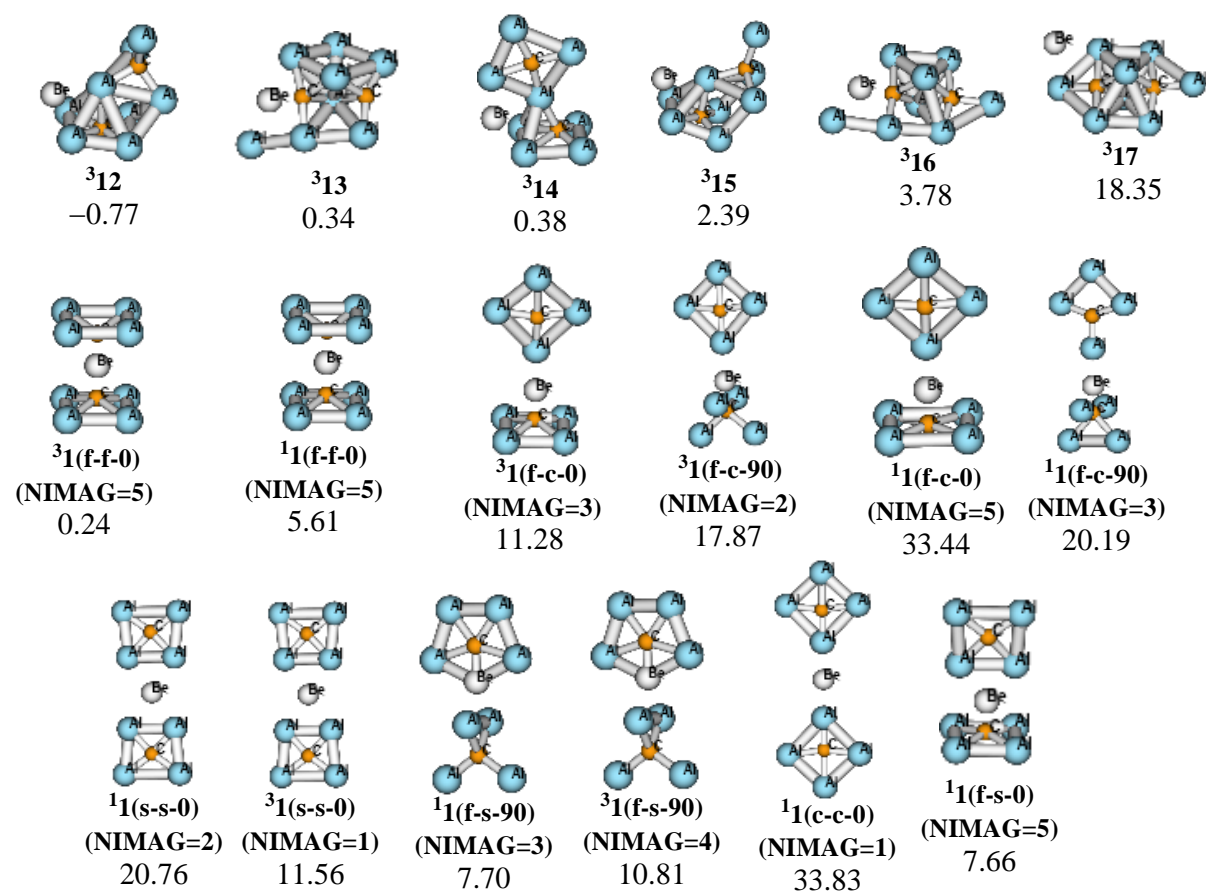

## 5. The calculated properties of $C_2Al_8Mg$

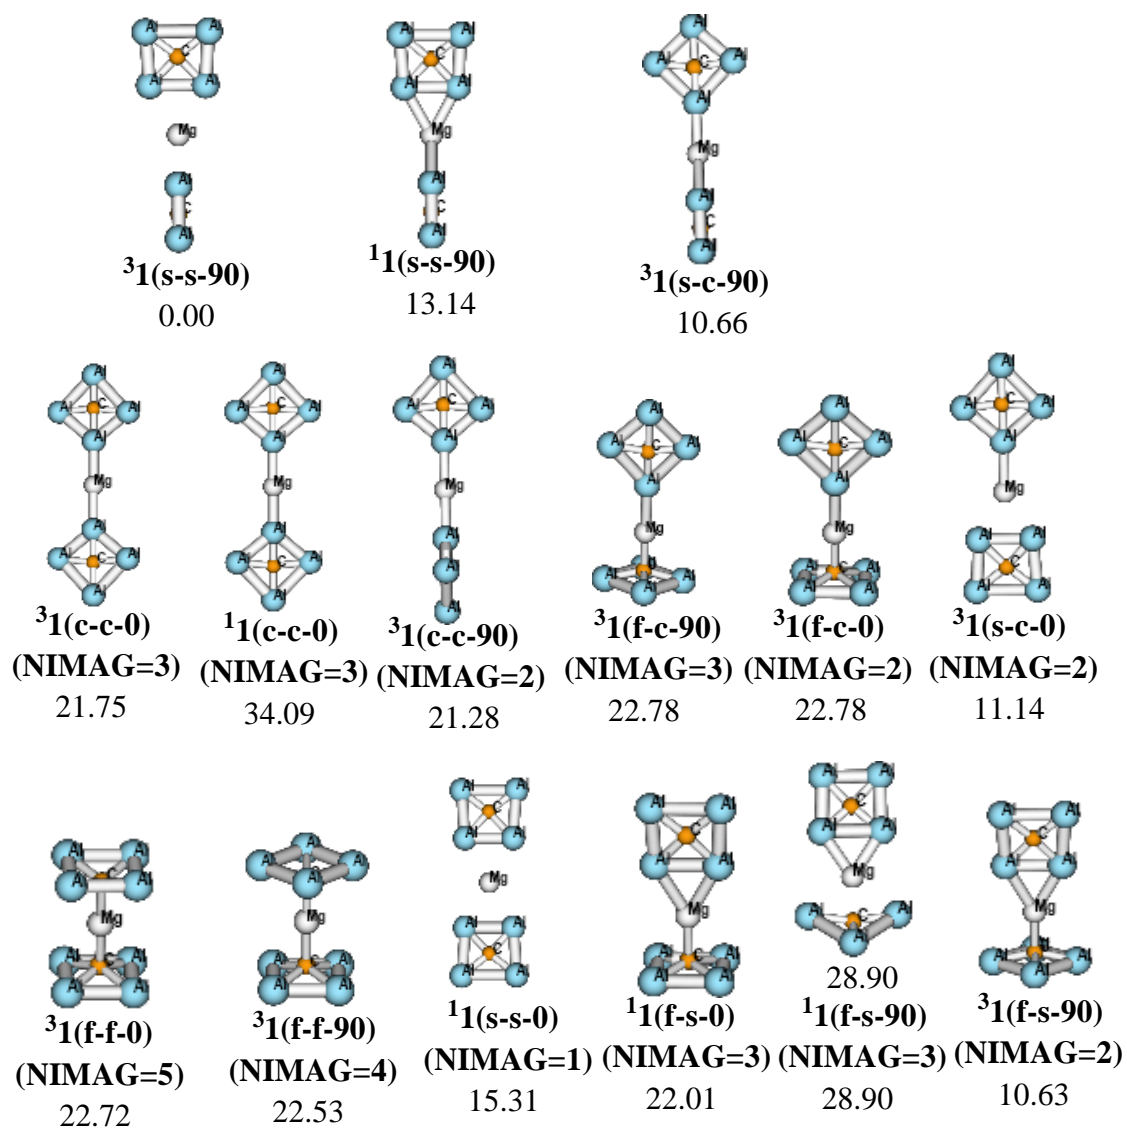

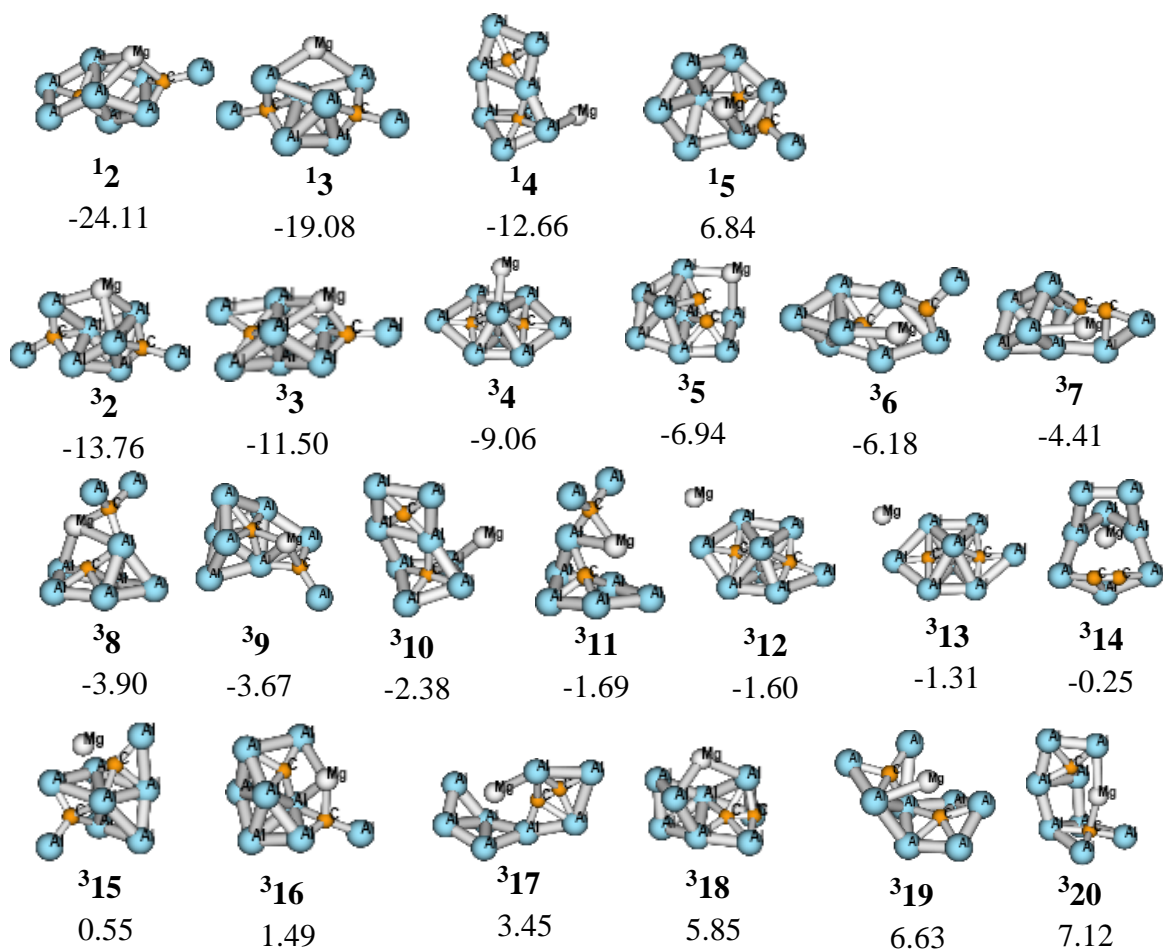

## 6. The calculated properties of $C_2Al_8Ca$

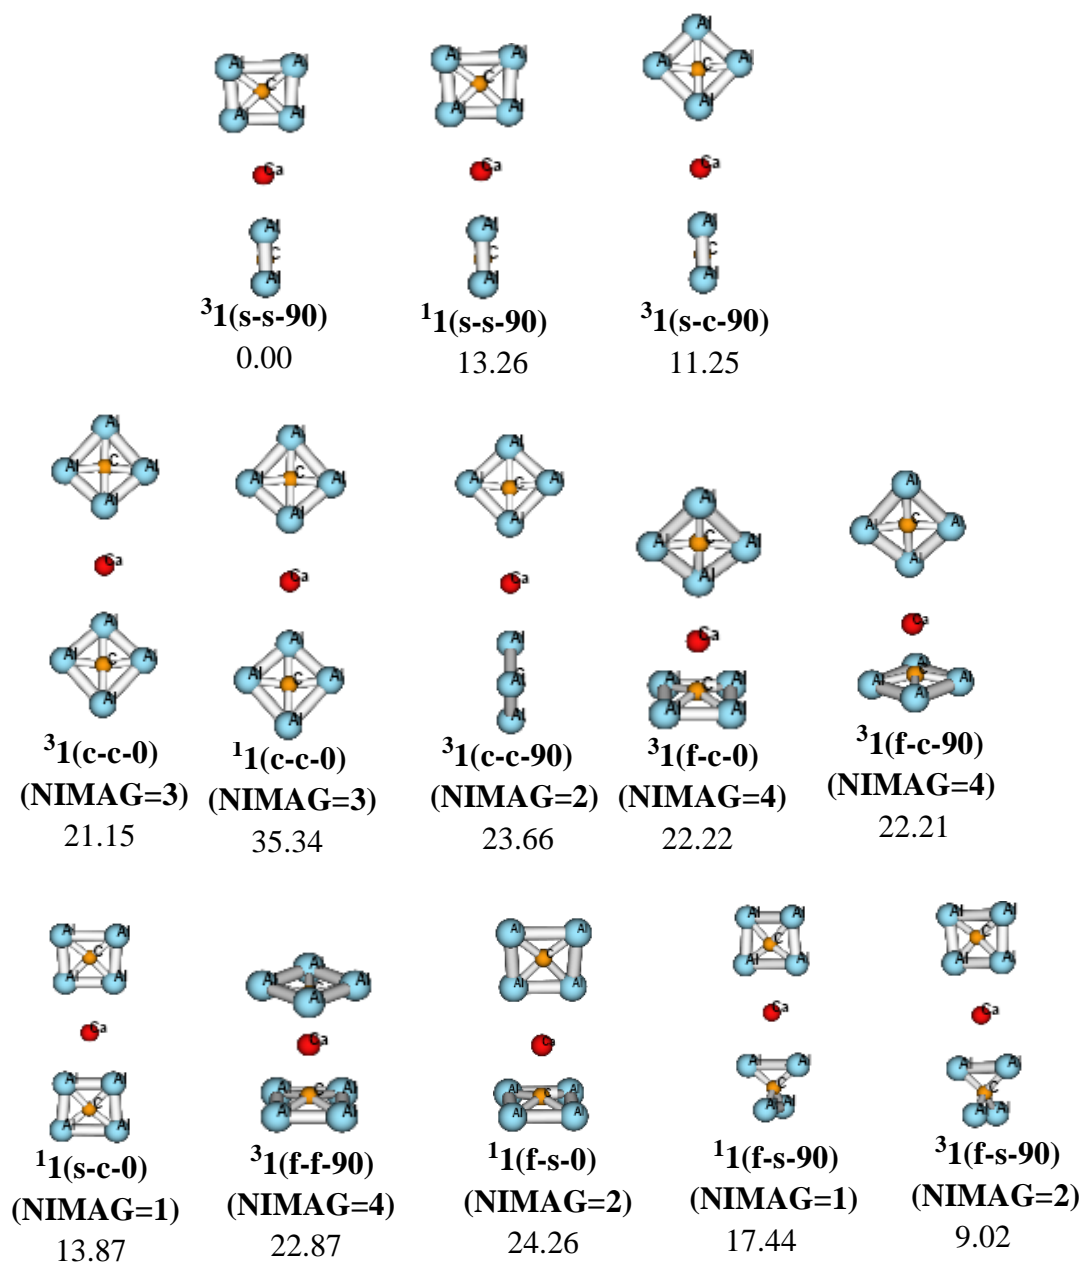

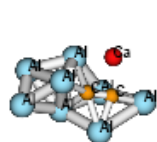

**32**  
-17.58

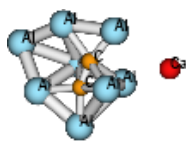

**33**  
-12.13

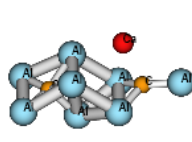

**34**  
-11.48

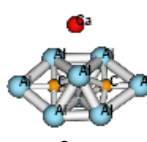

**35**  
-9.66

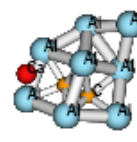

**36**  
-9.62

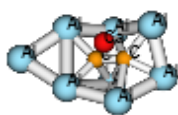

**37**  
-9.34

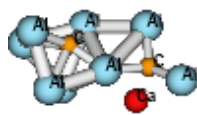

**38**  
-7.10

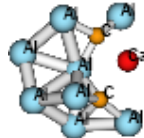

**39**  
-5.30

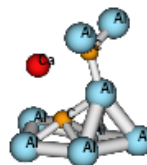

**310**  
-4.39

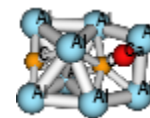

**311**  
-3.73

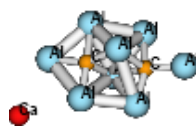

**312**  
-3.45

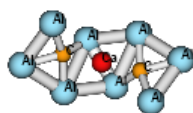

**313**  
2.07

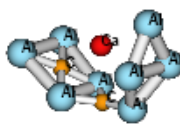

**314**  
27.22

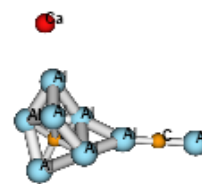

**315**  
47.30

## 7. The calculated properties of $C_2Al_8Li_2$

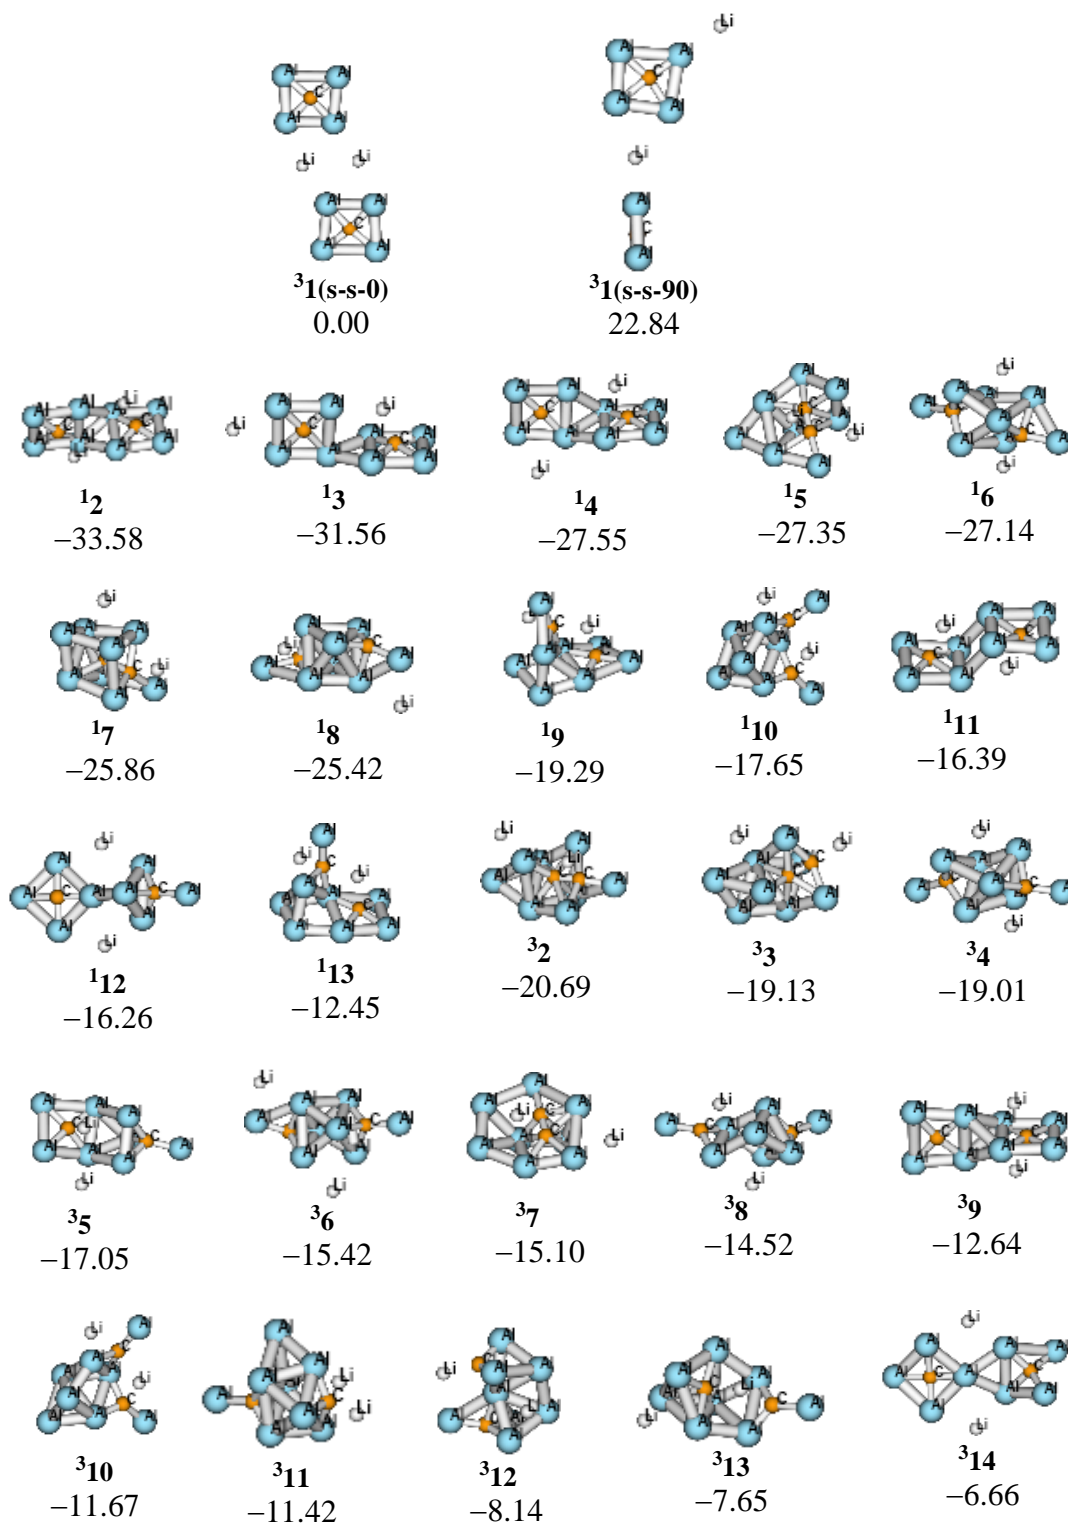



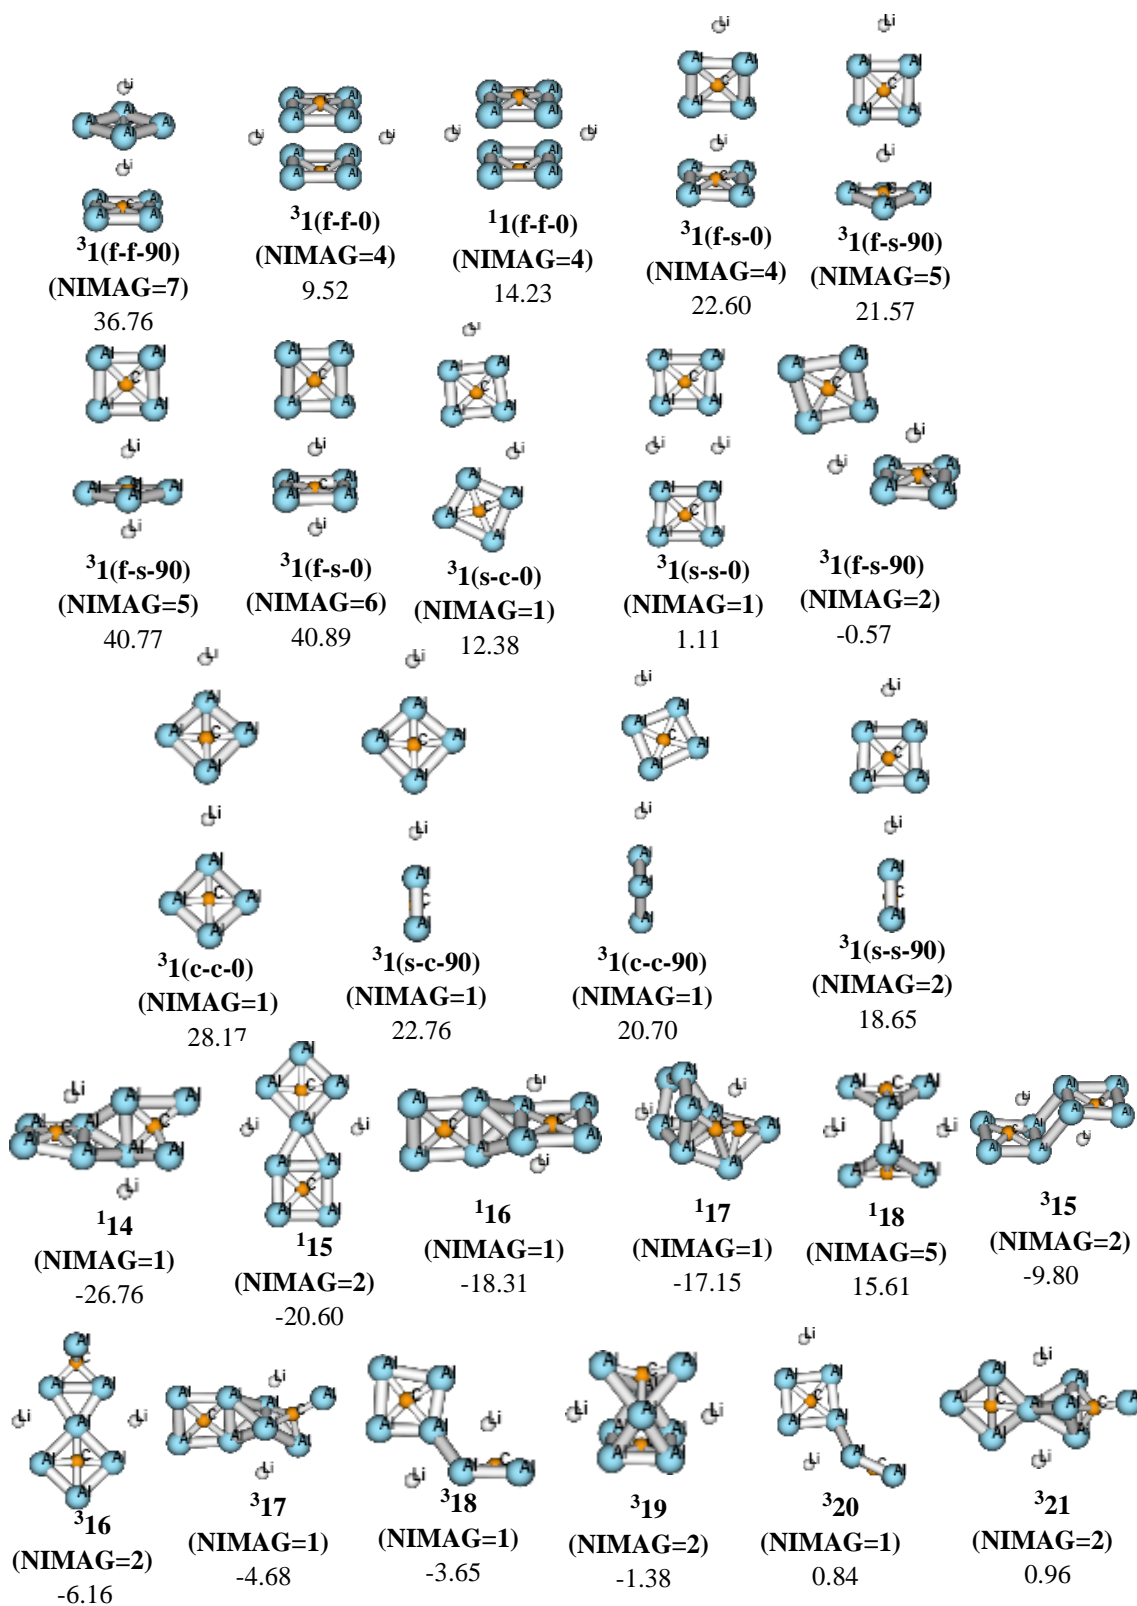

## 8. The calculated properties of $C_2Al_8Na_2$

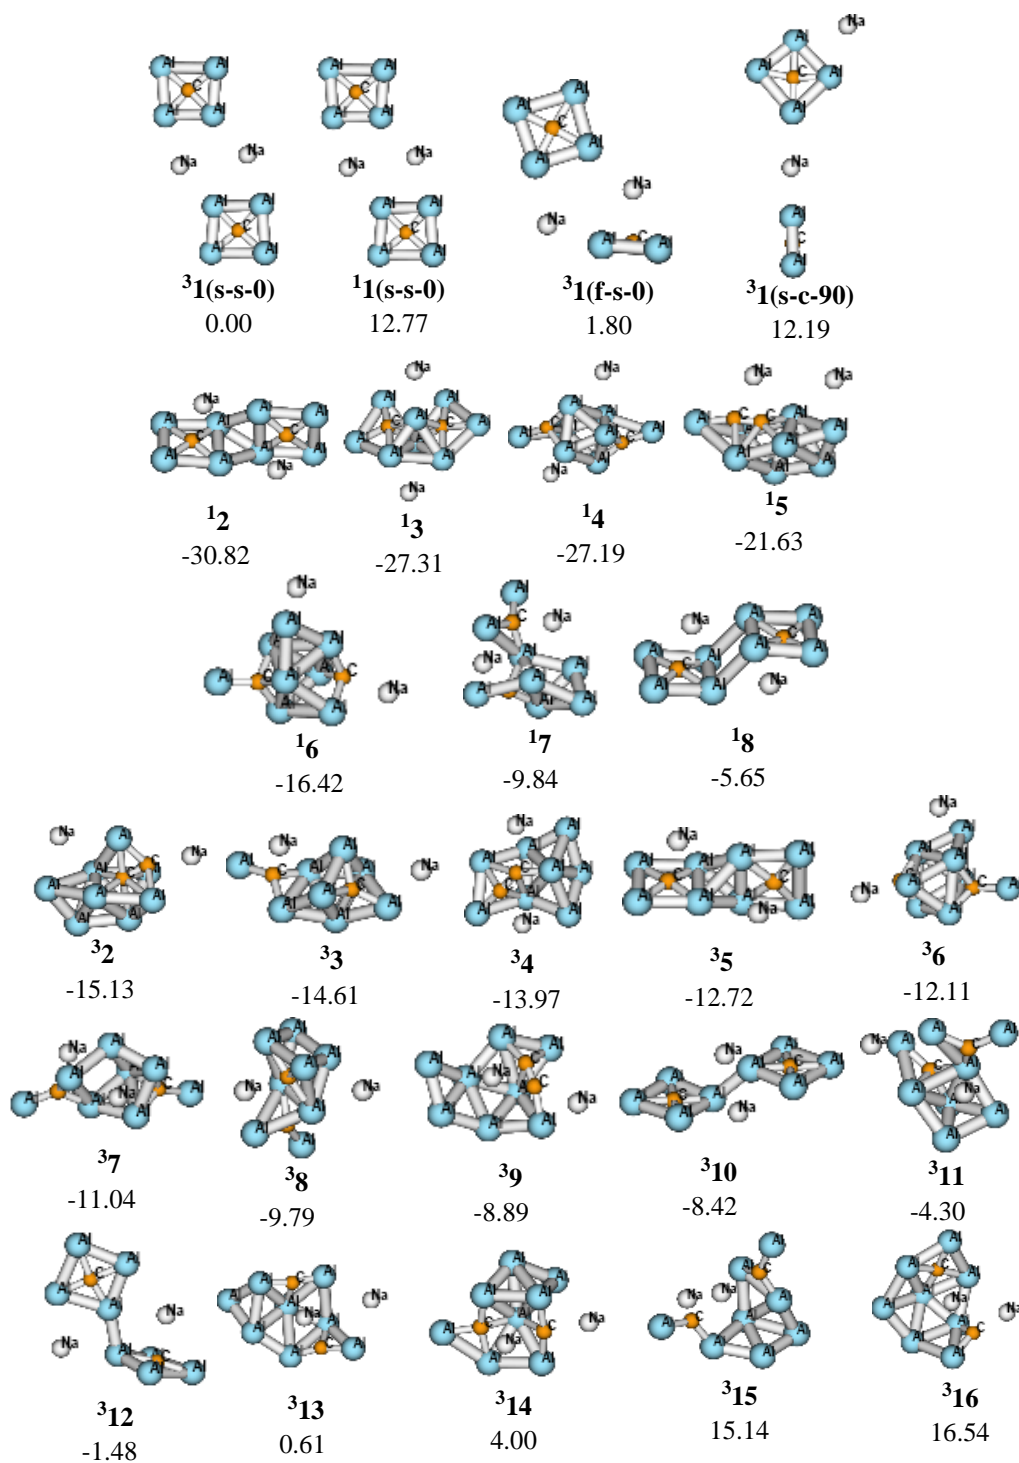

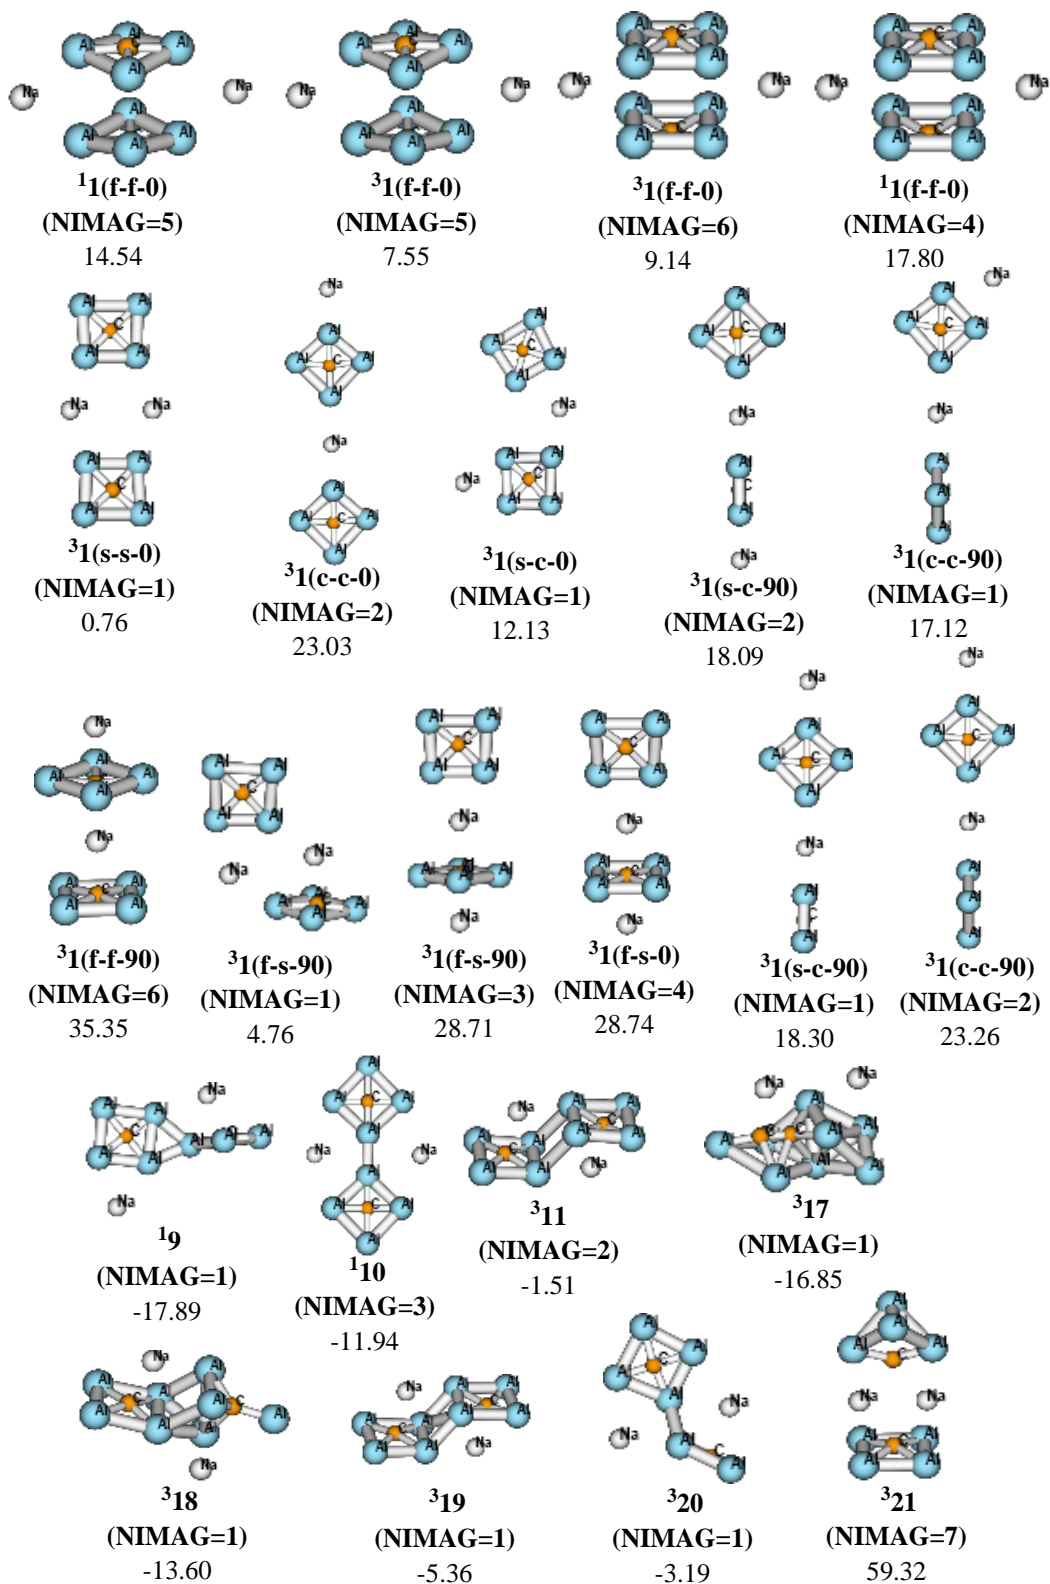

## 9. The calculated properties of $C_2Al_8K_2$

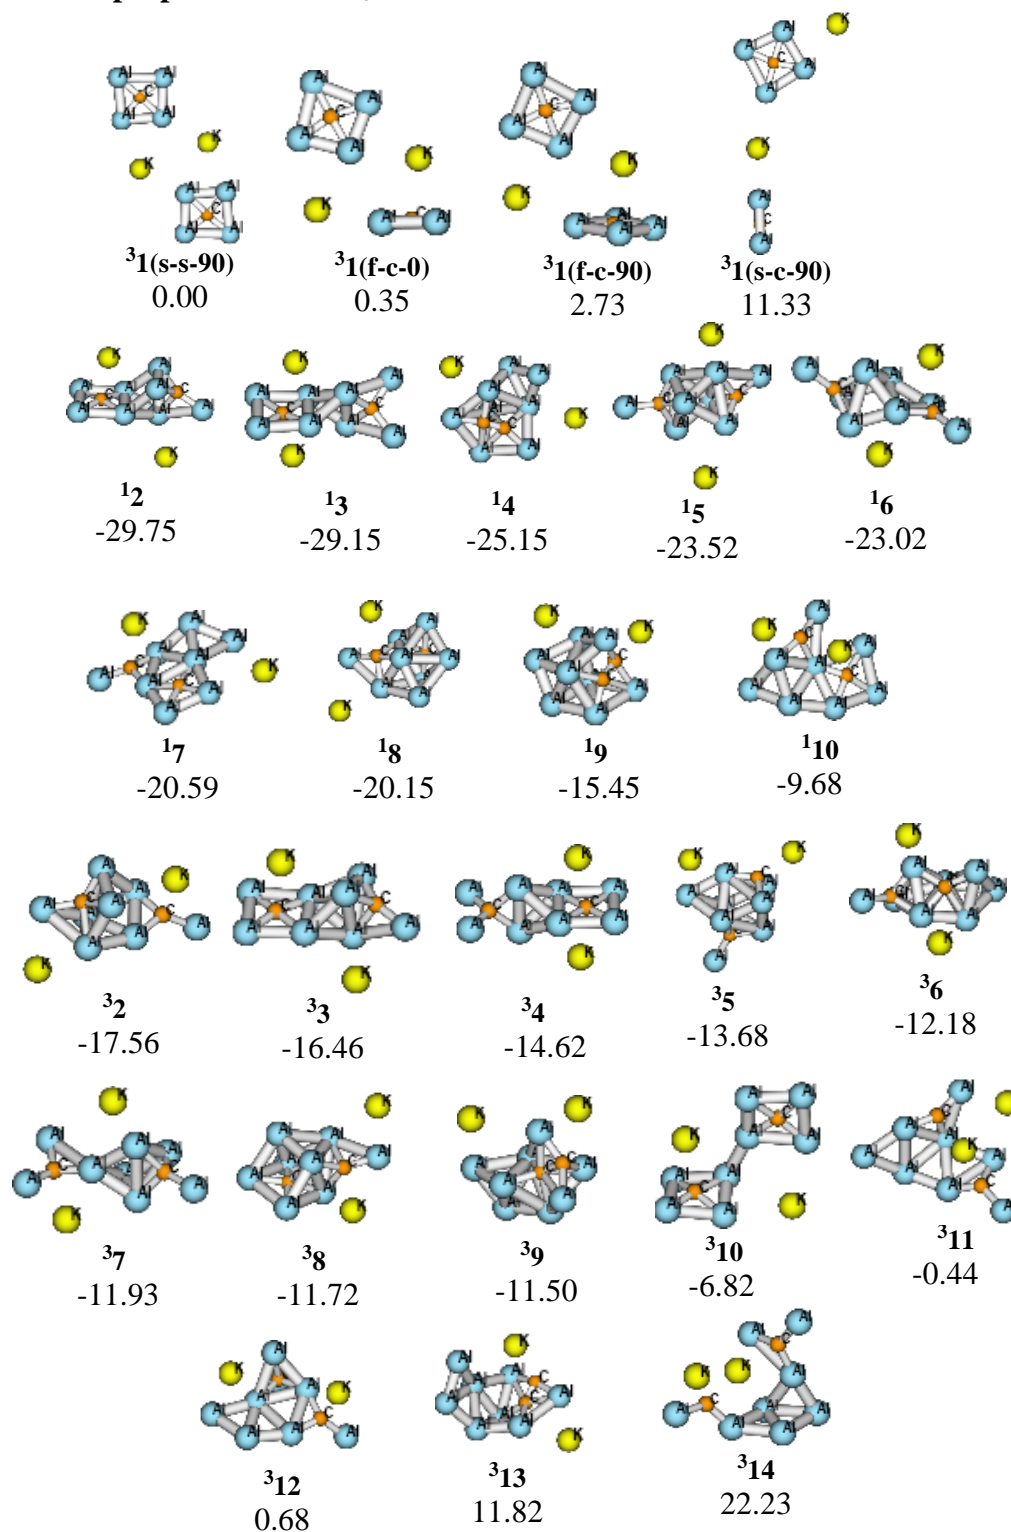

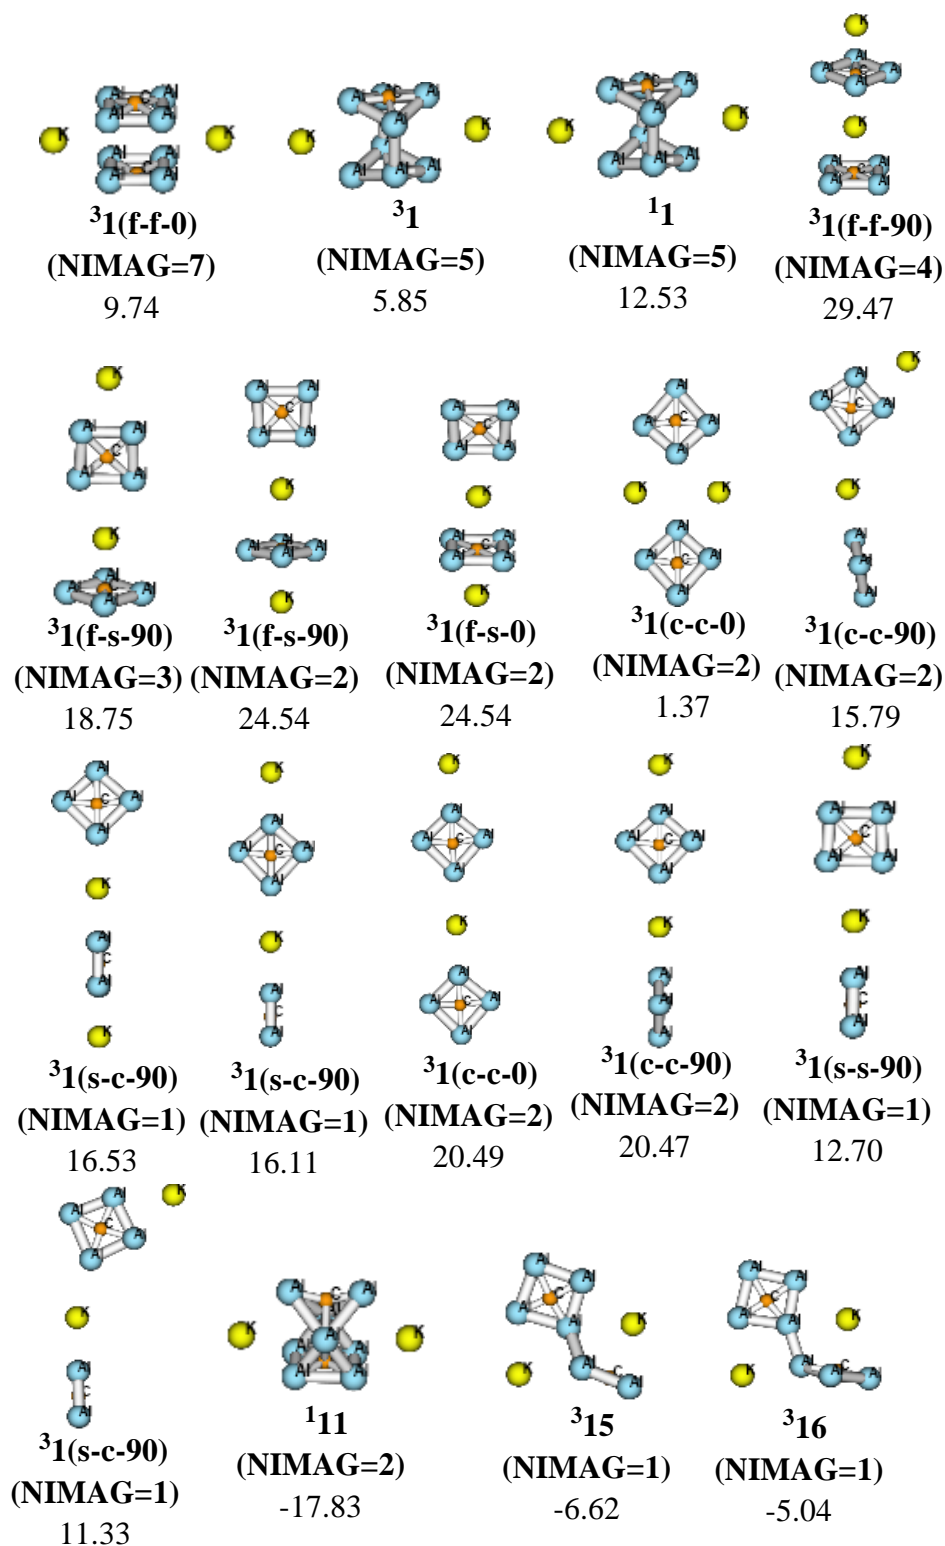



### 11. The calculated properties of ${}^1\text{CAL}_4\text{NaCp}^-$

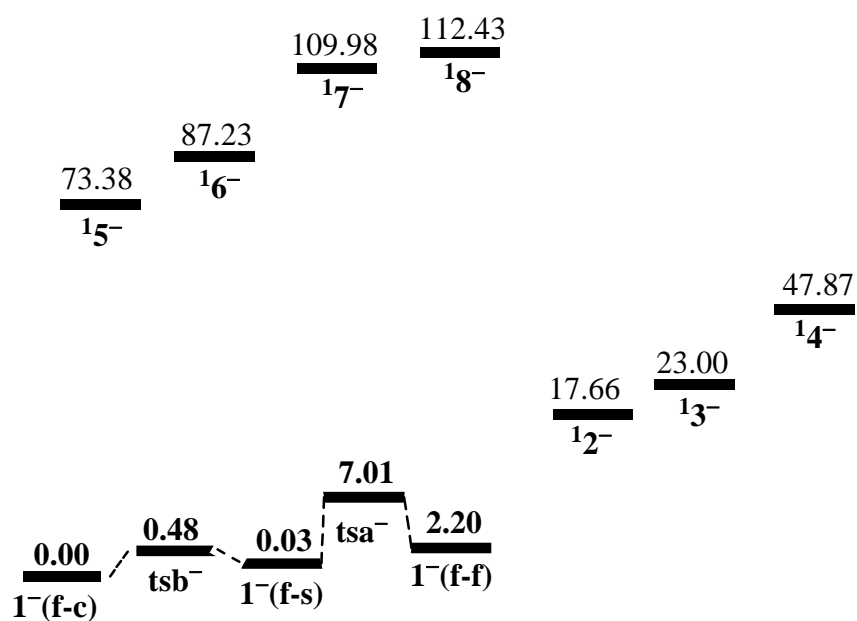

"f-f" stands for face-to-face sandwich form,

"f-s" stands for face-to-side sandwich form,

"f-c" stands for face-to-corner sandwich form,  $\text{CpNaCAL}_4^-$

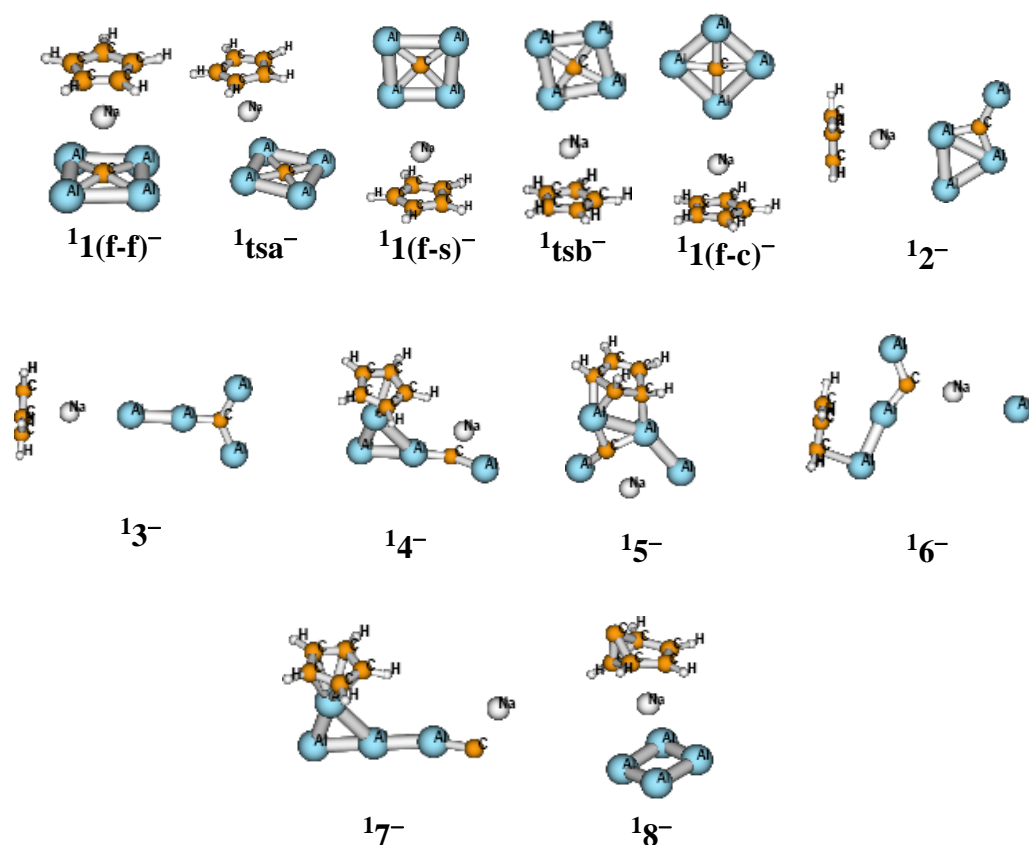



## 12. The calculated properties of ${}^1\text{CAl}_4\text{KCp}^-$

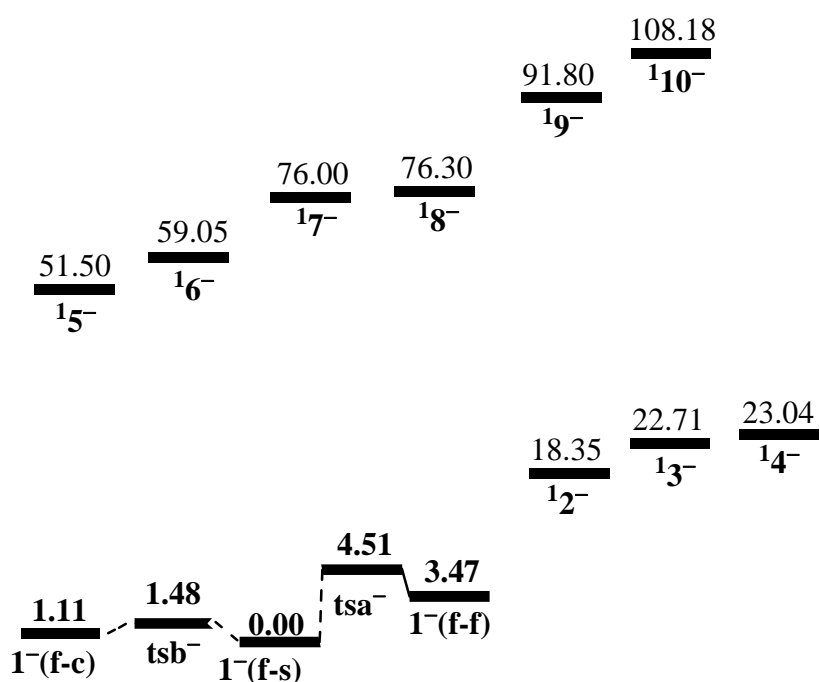

"f-f" stands for face-to-face sandwich form,

"f-s" stands for face-to-side sandwich form,

"f-c" stands for face-to-corner sandwich form,  $\text{CpKAl}_4^-$

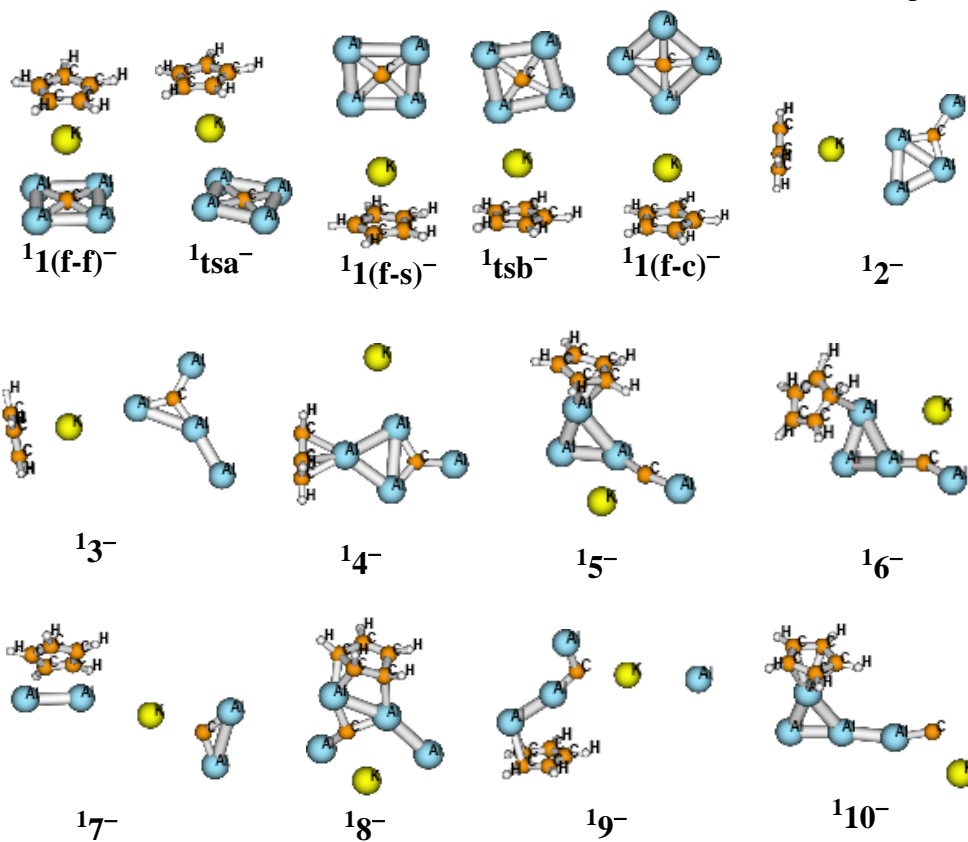



### 13. The calculated properties of ${}^1\text{CaI}_4\text{BeCp}$

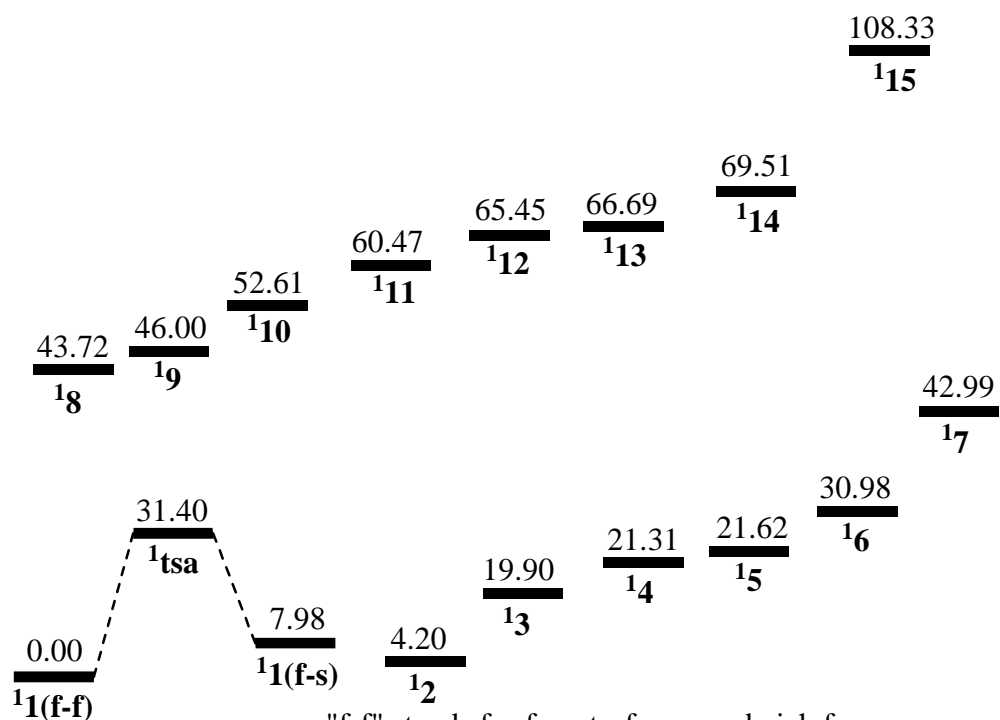

"f-f" stands for face-to-face sandwich form,  
 "f-s" stands for face-to-side sandwich form,  $\text{CpBeCaI}_4$

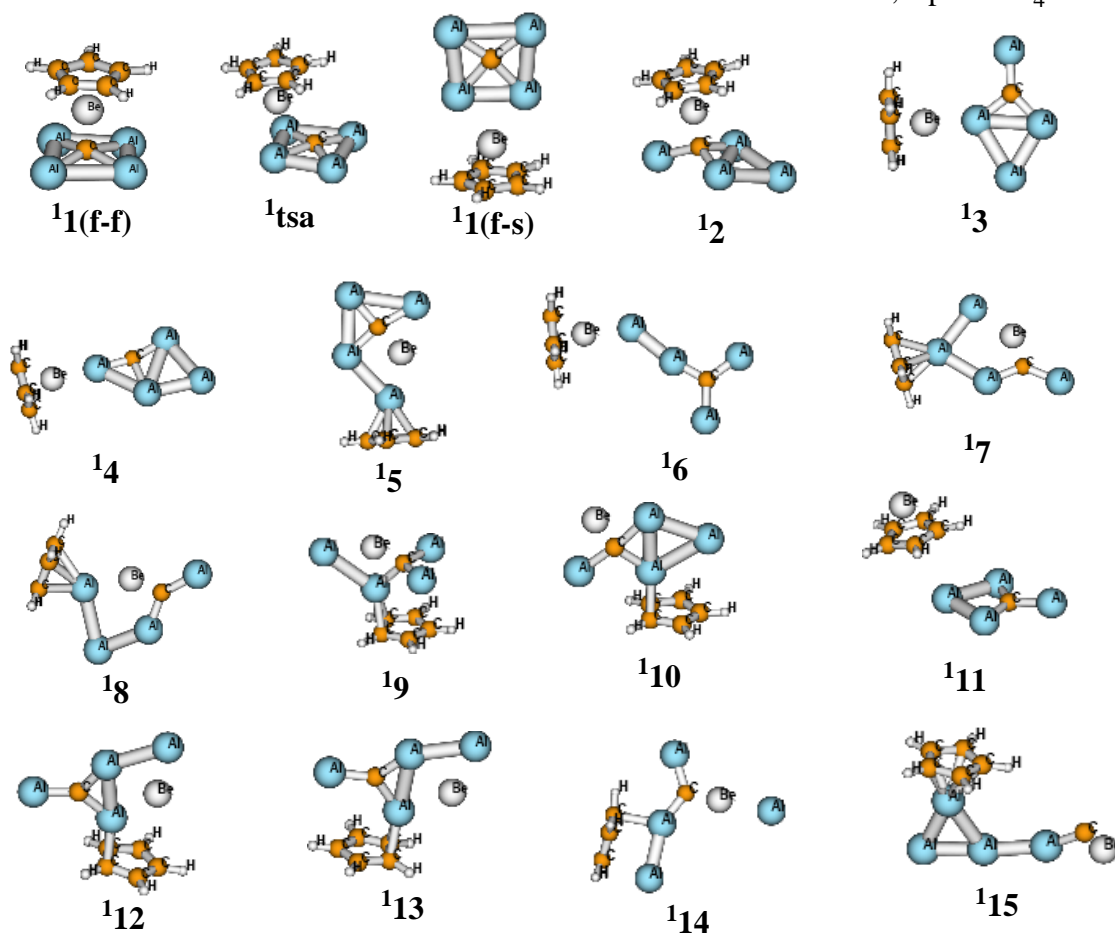

### 14. The calculated properties of ${}^1\text{CAl}_4\text{MgCp}$

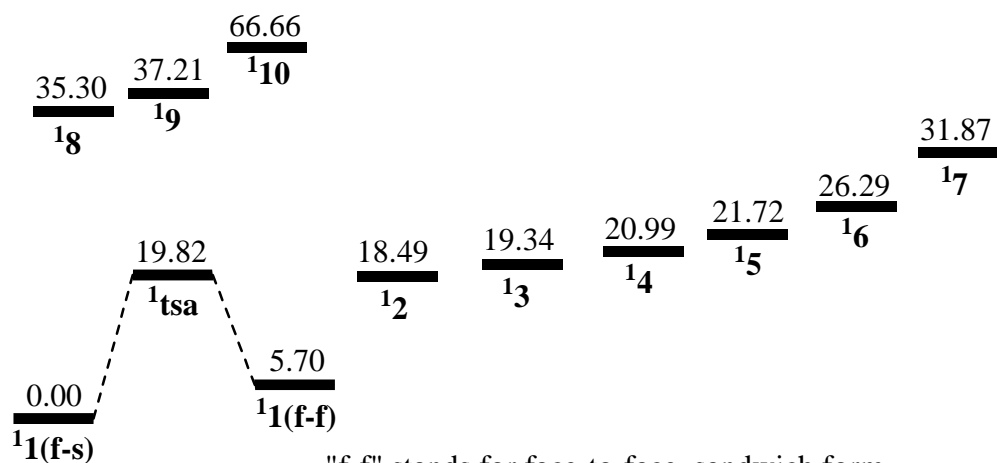

"f-f" stands for face-to-face sandwich form,  
 "f-s" stands for face-to-side sandwich form,  $\text{CpMgCAl}_4$

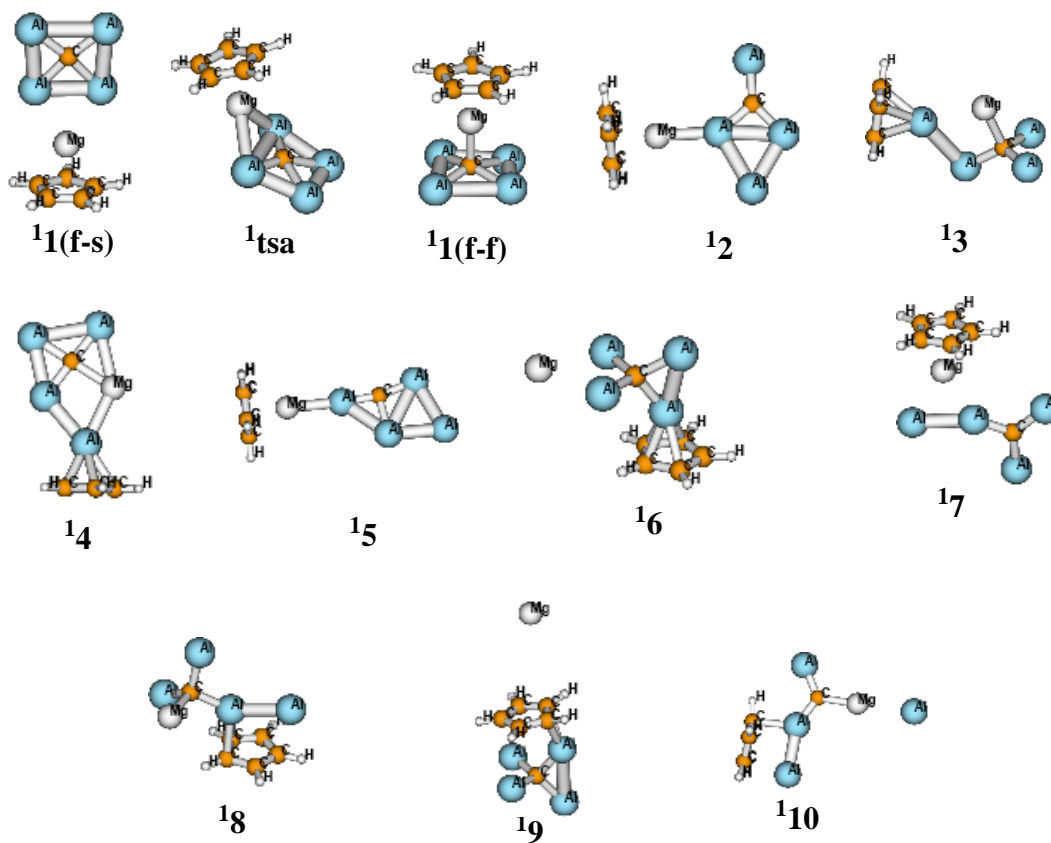



### 16. The calculated properties of $(\text{Li})^+\text{Al}_4\text{MCp}^-$ ( $\text{M}=\text{Li}, \text{Na}, \text{K}$ )

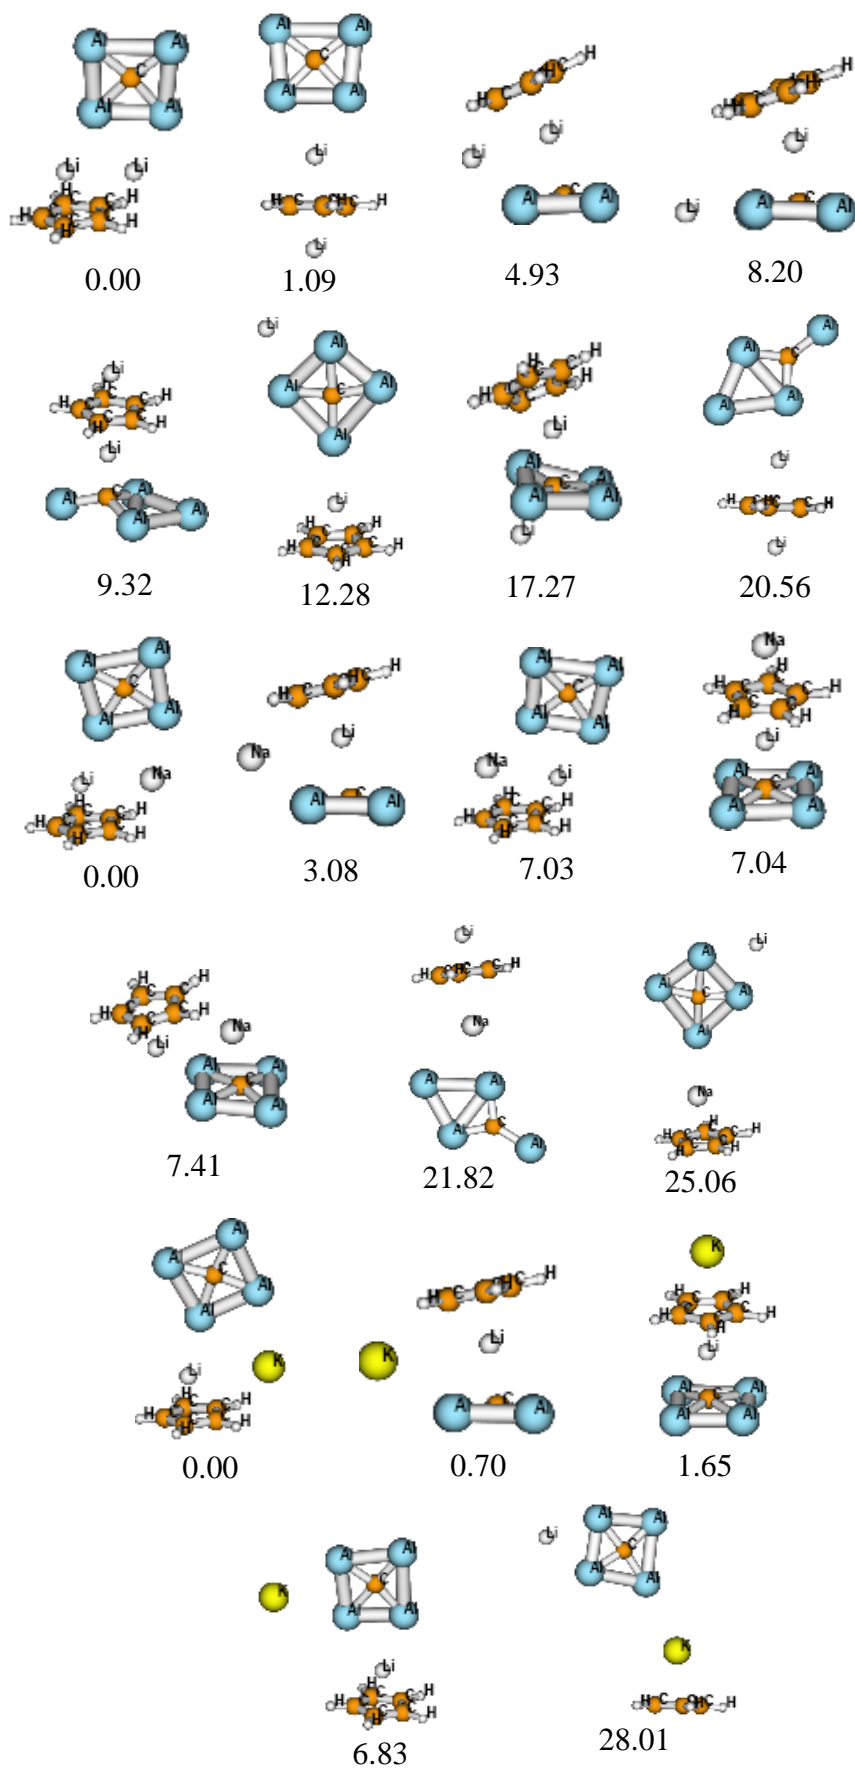

## 17. The calculated properties of various extend system

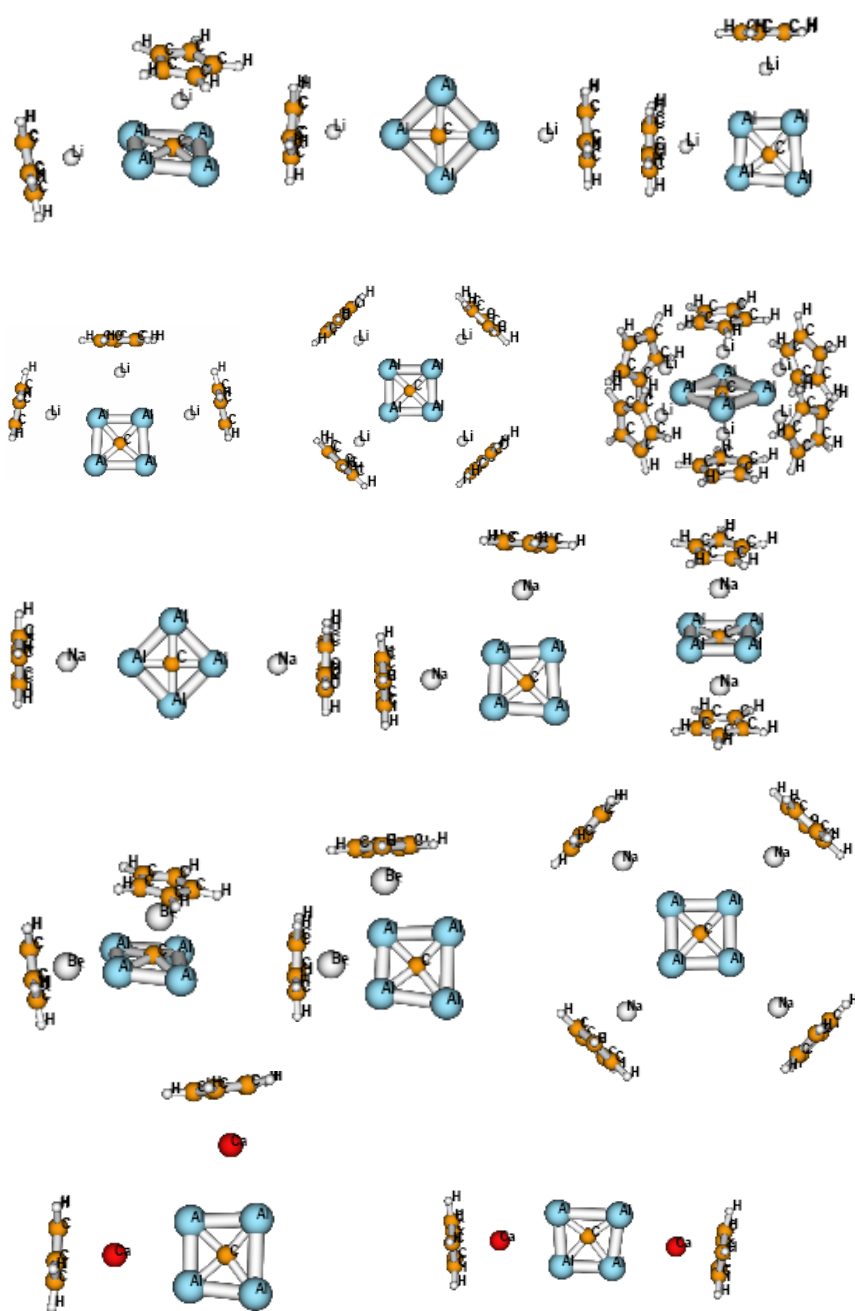

Supplement: b707898f.pdf [file b707898f.pdf]
